# Supplementary material for: Predicting the regioselectivity of arynes: a simple model based on orbital electronegativity
Source: Royal Society of Chemistry journal article supplement (doi:10.1039/c8nj04027c), 2018-12-13

## *Electronic Supplementary Information*

### **Predicting the regioselectivity of arynes: a simple model based on orbital electronegativity**

*Saber Mirzaei*<sup>\*a</sup> and *Hormoz Khosravi*<sup>b</sup>

<sup>a</sup>Department of Chemistry, Marquette University, Milwaukee, WI 53201-1414, USA.

<sup>b</sup>Faculty of Chemistry, K. N. Toosi University of Technology, P.O. Box: 15875-4416, Tehran, Iran.

\*Email: [saber.mirzaei@marquette.edu](mailto:saber.mirzaei@marquette.edu)

#### *Table of Contents*

|                 |                                                                                   |           |
|-----------------|-----------------------------------------------------------------------------------|-----------|
| <b>Fig. S1</b>  | Predicted <sup>13</sup> C NMR shifts for 14 different substituted benzynes        | <b>2</b>  |
| <b>Fig. S2</b>  | Predicted <sup>13</sup> C NMR shifts for 16 different heterocyclic arynes         | <b>3</b>  |
| <b>Fig. S3</b>  | Predicted <sup>13</sup> C NMR shifts for 3 different nonaromatic alkynes          | <b>3</b>  |
| <b>Fig. S4</b>  | Linear correlation of Gasteiger calculated charge vs $\pi$ OE values              | <b>4</b>  |
| <b>Fig. S5</b>  | Calculated total charges for 14 different substituted benzynes                    | <b>4</b>  |
| <b>Fig. S6</b>  | Calculated total charges for 16 different heterocyclic arynes                     | <b>5</b>  |
| <b>Fig. S7</b>  | Calculated total charges for 3 different nonaromatic alkynes                      | <b>5</b>  |
| <b>Fig. S8</b>  | Calculated NBO charges for 14 different substituted benzynes (B3LYP/6-31G*)       | <b>6</b>  |
| <b>Fig. S9</b>  | Calculated NBO charges for 16 different heterocyclic arynes (B3LYP/6-31G*)        | <b>7</b>  |
| <b>Fig. S10</b> | Calculated NBO charges for 3 different nonaromatic alkynes (B3LYP/6-31G*)         | <b>7</b>  |
| <b>Fig. S11</b> | The energy profile of reaction of 2-methoxyfuran with 7,8-quinolyne (HF/6-31G*)   | <b>8</b>  |
| <b>Fig. S12</b> | HOMO-CA of 2-methoxyfuran (B3LYP/6-31G*) using Hirshfeld population analysis      | <b>8</b>  |
| <b>Fig. S13</b> | Comparison between predicted OE and calculated internal angle differences         | <b>9</b>  |
| <b>Table S1</b> | OE of some substituted benzynes and indolynes which do not studied experimentally | <b>10</b> |
| <b>S1</b>       | OE calculations setup procedures                                                  | <b>12</b> |
| <b>S2</b>       | Computational details                                                             | <b>14</b> |
| <b>S3</b>       | References                                                                        | <b>14</b> |

**Fig. S1.** Predicted  $^{13}\text{C}$  NMR shifts for 14 different substituted benzyne (using MarvinSketch 17.13). Red value and asterisk show the preferred position based on the NMR shift and experimental data, respectively. The  $^{13}\text{C}$  NMR shifts predict incorrect position for compounds 5, 7, 9, 12, 13 and 14.

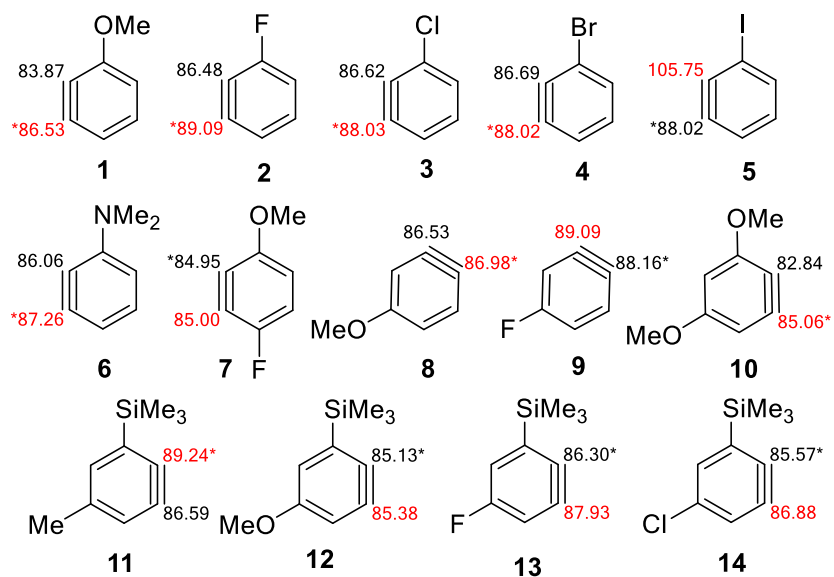

**Fig. S2.** Predicted  $^{13}\text{C}$  NMR shifts for 16 different heterocyclic arynes (using MarvinSketch 17.13). Red value and asterisk show the preferred position based on the NMR shift and experimental data, respectively. The  $^{13}\text{C}$  NMR shifts predict incorrect position for compounds 17, 19 and 26.

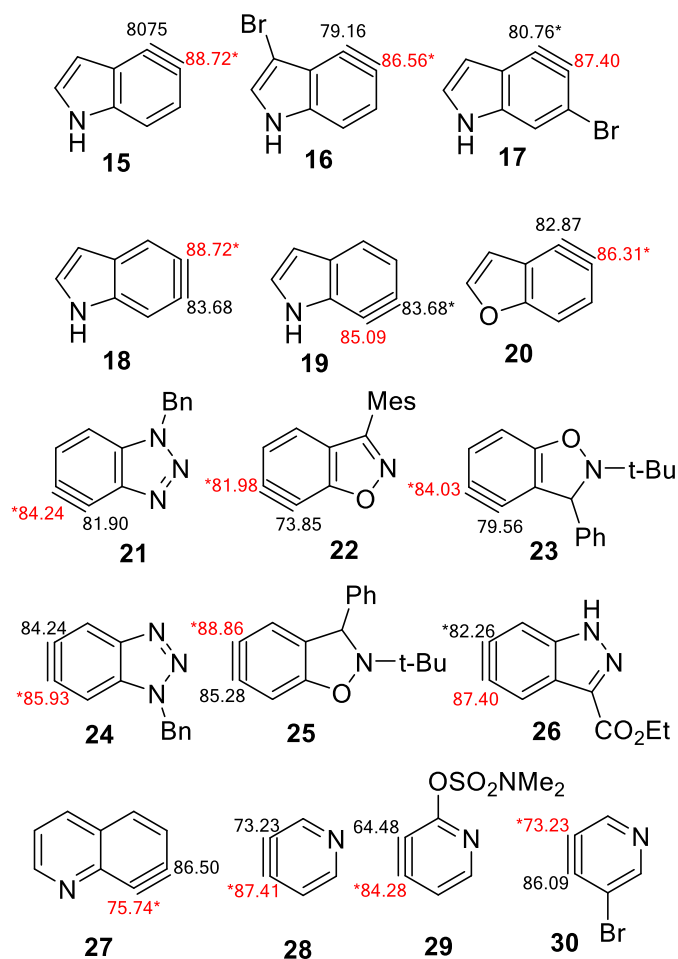

**Fig. S3.** Predicted  $^{13}\text{C}$  NMR shifts for 3 different nonaromatic alkynes (using MarvinSketch 17.13). Red value and asterisk show the preferred position based on the NMR shift and experimental data, respectively.

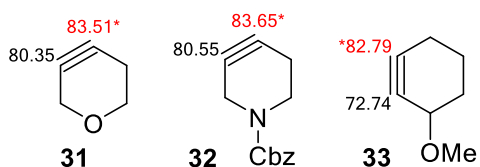

**Fig. S4.** Linear correlation of Gasteiger calculated charge vs  $\pi$  OE values for 30 arynes at the experimentally predicted carbon (Figures S5 and S6).

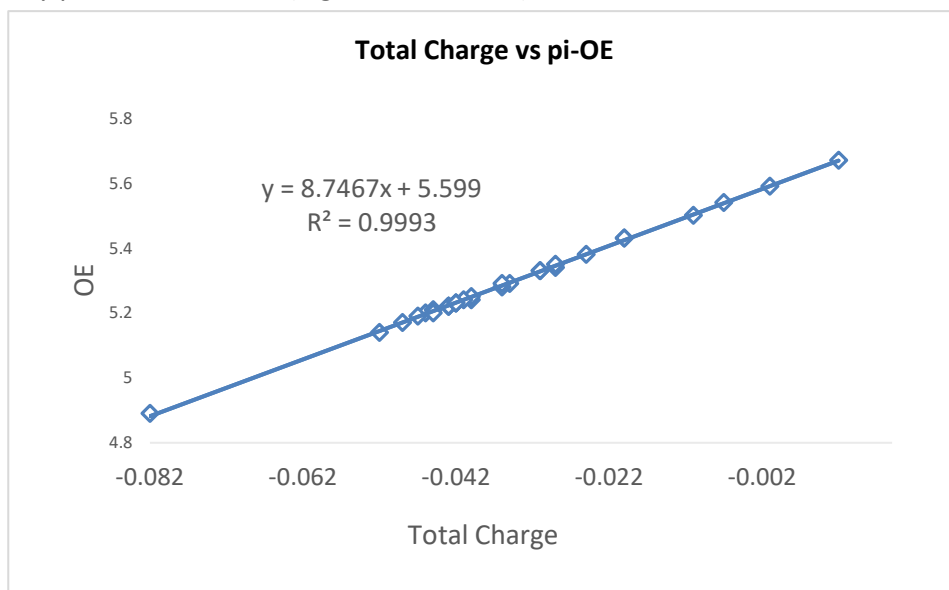

**Fig. S5.** Calculated total charges for 14 different substituted benzynes (using MarvinSketch 17.13). Red value and asterisk show the preferred position based on the calculated total charge and experimental data, respectively.

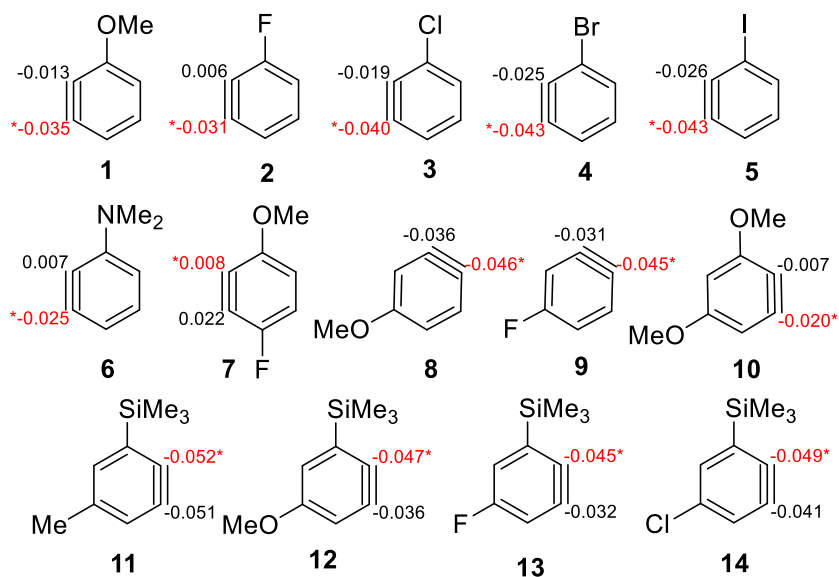

**Fig. S6.** Calculated total charges for 16 different heterocyclic arynes (using MarvinSketch 17.13). Red value and asterisk show the preferred position based on the calculated total charge and experimental data, respectively.

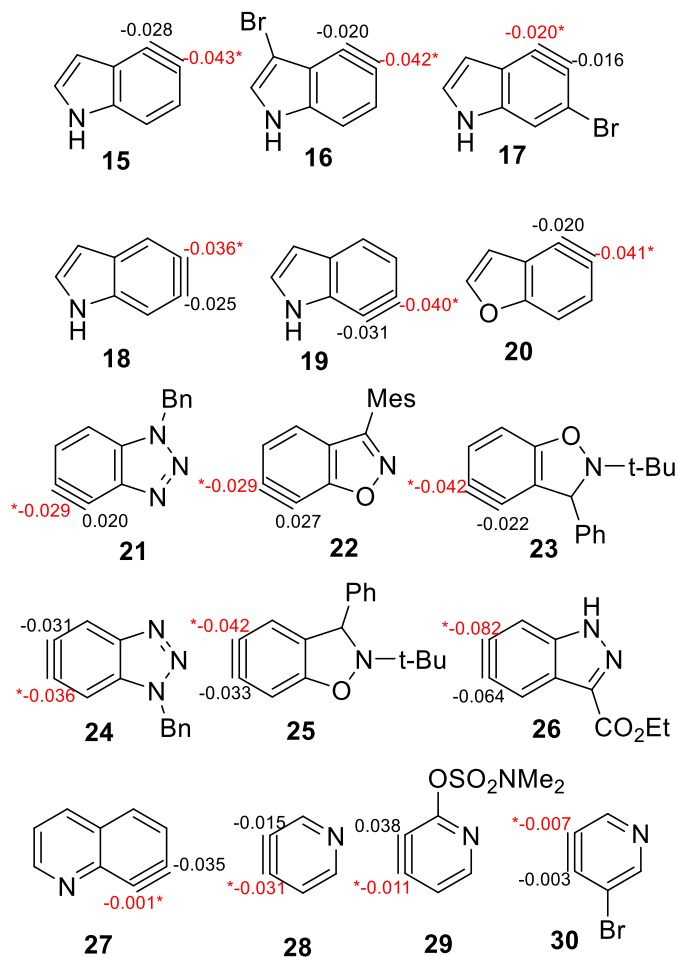

**Fig. S7.** Calculated total charges for 3 different nonaromatic alkynes (using MarvinSketch 17.13). Red value and asterisk show the preferred position based on the calculated total charge and experimental data, respectively.

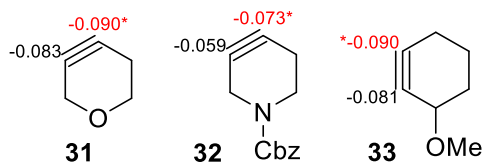

**Fig. S8.** Calculated NBO charges for 14 different substituted benzynes (B3LYP/6-31G\*). Red value and asterisk show the preferred position based on the calculated NBO charge and experimental data, respectively. The NBO charge predicts incorrect position for compounds 7-9.

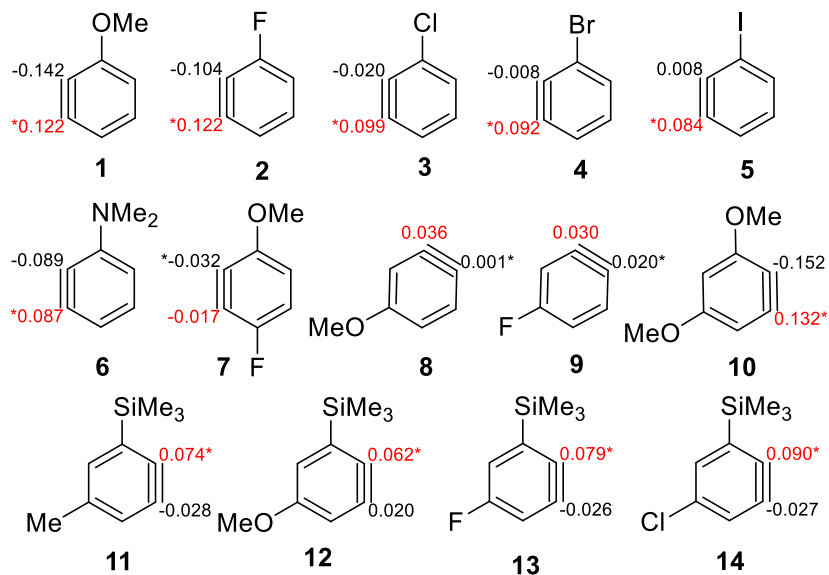

**Fig. S9.** Calculated NBO charges for 16 different heterocyclic arynes (B3LYP/6-31G\*). Red value and asterisk show the preferred position based on the calculated NBO charge and experimental data, respectively. The NBO charge predicts incorrect position for compounds 15, 24-26.

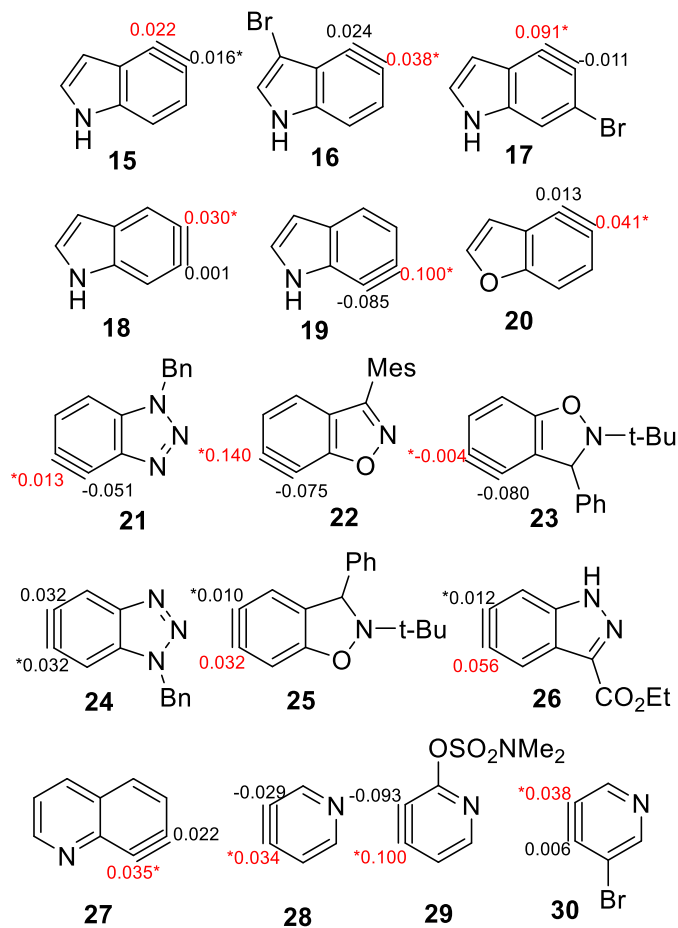

**Fig. S10.** Calculated NBO charges for 3 different nonaromatic alkynes (B3LYP/6-31G\*). Red value and asterisk show the preferred position based on the calculated total charge and experimental data, respectively.

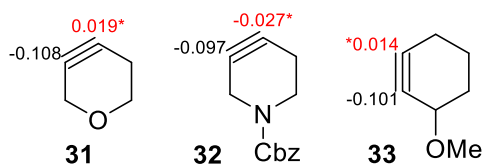

**Fig. S11.** The energy profile of reaction of 2-methoxyfuran with 7,8-quinolyne (kcal.mol<sup>-1</sup>, HF/6-31G\*).

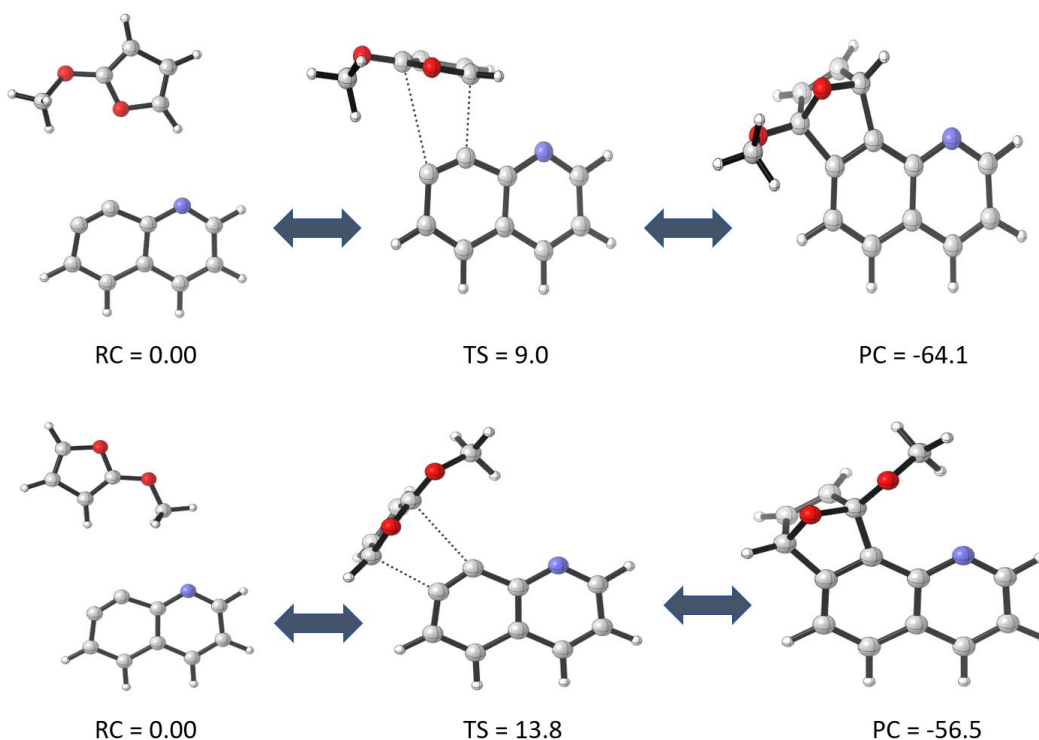

**Fig. S12.** The highest occupied molecular orbital contribution analysis (HOMO-CA) of 2-methoxyfuran (B3LYP/6-31G\*) using Hirshfeld population analysis.

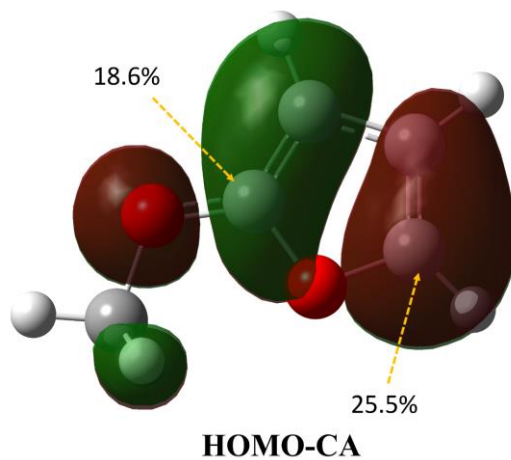



**Fig. S13.** Comparison between predicted OE and calculated internal angle differences (distortion model).

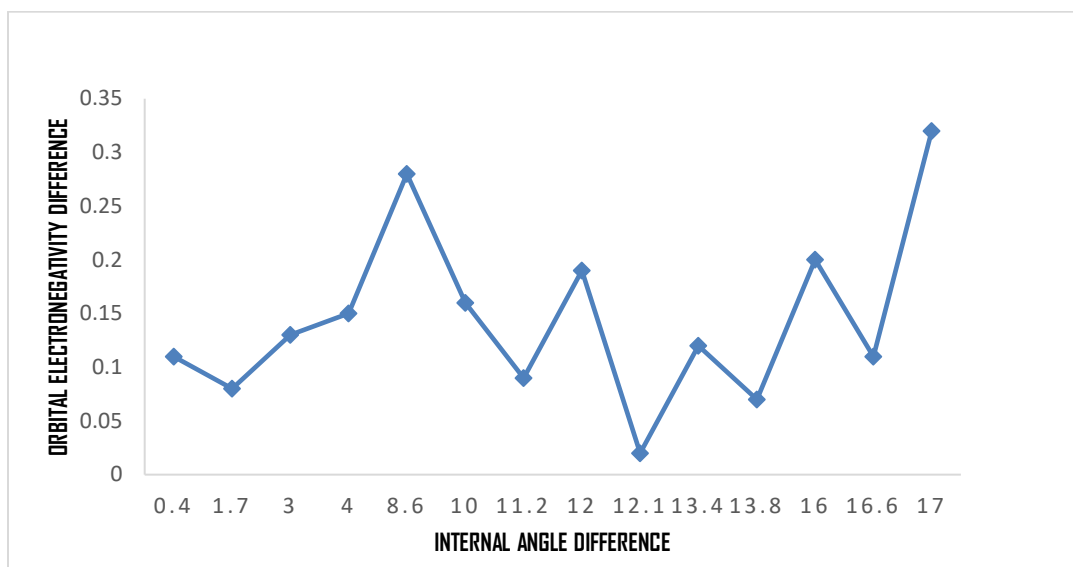

**Table S1.** OE of some substituted benzyne and indolynes which do not studied experimentally.

| Structure                                                                           | OE   |      | Distortion <sup>12b</sup> |     | LUMO-CA <sup>5</sup> |      |
|-------------------------------------------------------------------------------------|------|------|---------------------------|-----|----------------------|------|
|                                                                                     | a    | b    | a°                        | b°  | a%                   | b%   |
| 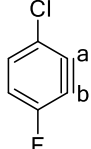   | 5.62 | 5.75 | 130                       | 122 | 39.3                 | 36.5 |
|    | 5.57 | 5.73 | 131                       | 122 | 39.1                 | 36.1 |
|    | 5.55 | 5.72 | 131                       | 121 | 37.8                 | 35.3 |
|   | 5.58 | 5.58 | 129                       | 124 | 38.3                 | 35.0 |
|  | 5.53 | 5.56 | 130                       | 123 | 38.2                 | 34.7 |
|  | 5.51 | 5.56 | 130                       | 123 | 37.0                 | 33.9 |
|  | 5.49 | 5.56 | 132                       | 122 | 40.4                 | 32.7 |
|  | 5.54 | 5.73 | 133                       | 120 | 41.3                 | 34.4 |
|  | 5.45 | 5.51 | 130                       | 123 | 40.0                 | 35.8 |

Table S1. Continued

|                                                                                     |      |      |     |     |      |      |
|-------------------------------------------------------------------------------------|------|------|-----|-----|------|------|
| 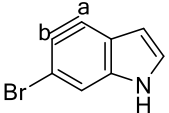   | 5.43 | 5.46 | 130 | 124 | 39.8 | 36.0 |
|    | 5.42 | 5.44 | 127 | 127 | 39.6 | 35.9 |
|    | 5.55 | 5.37 | 122 | 135 | 33.3 | 40.6 |
|    | 5.71 | 5.41 | 120 | 135 | 34.9 | 41.4 |
|    | 5.50 | 5.33 | 124 | 132 | 36.5 | 40.0 |
|    | 5.45 | 5.31 | 125 | 131 | 36.6 | 39.8 |
|   | 5.43 | 5.30 | 127 | 129 | 36.5 | 39.4 |
|  | 5.59 | 5.48 | 129 | 123 | 35.6 | 37.4 |
|  | 5.76 | 5.52 | 125 | 126 | 37.1 | 38.5 |
|  | 5.54 | 5.43 | 129 | 123 | 38.5 | 37.0 |
|  | 5.49 | 5.41 | 130 | 122 | 38.5 | 36.5 |
|  | 5.47 | 5.40 | 130 | 122 | 37.5 | 35.9 |

## S1. OE (Orbital Electronegativity) calculations setup procedures.

The latest version of MarvinSketch can be downloaded free of charge from ChemAxon (<https://www.chemaxon.com/download/marvin-suite/#marvin>)

Draw anyne that you want to predict its regioselectivity.

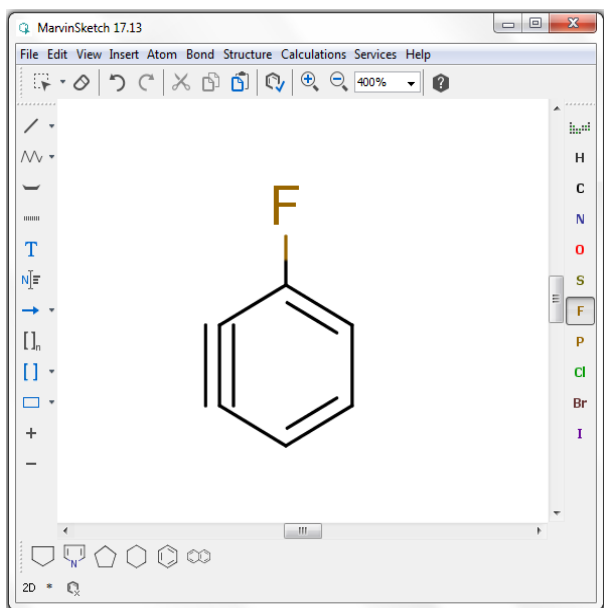

Chose Calculations, Charge and Orbital Electronegativity

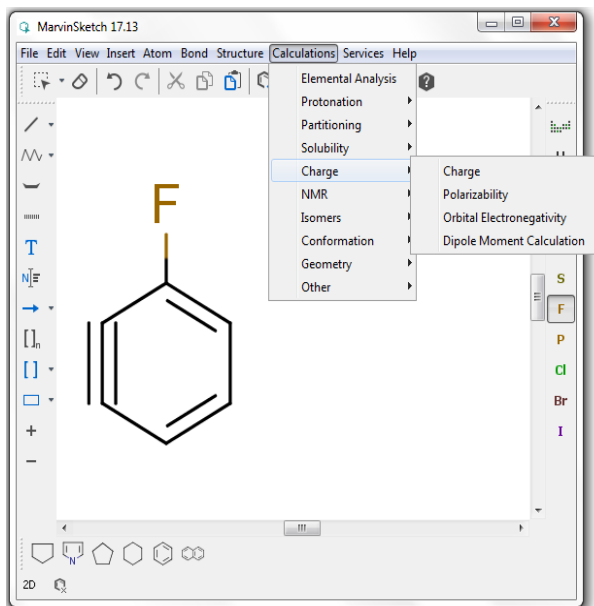

Orbital Electronegativity Options window will be open. Select Decimal places 2 (default value), orbital type (pi orbitals) and take major microspecies (this option provide better results compared to experimental data).

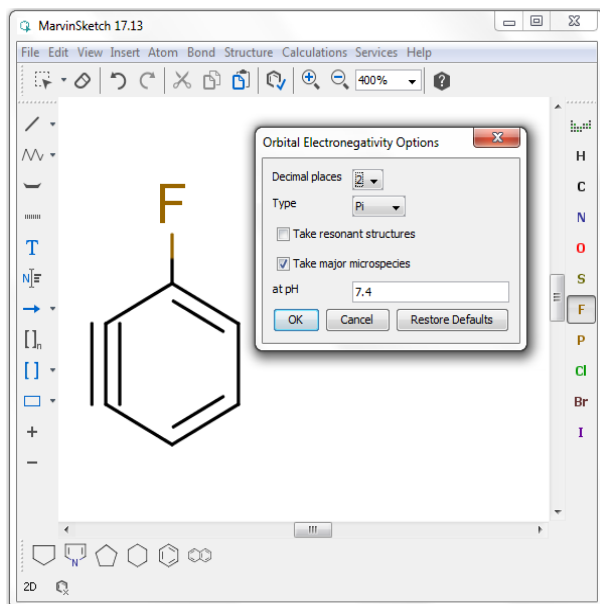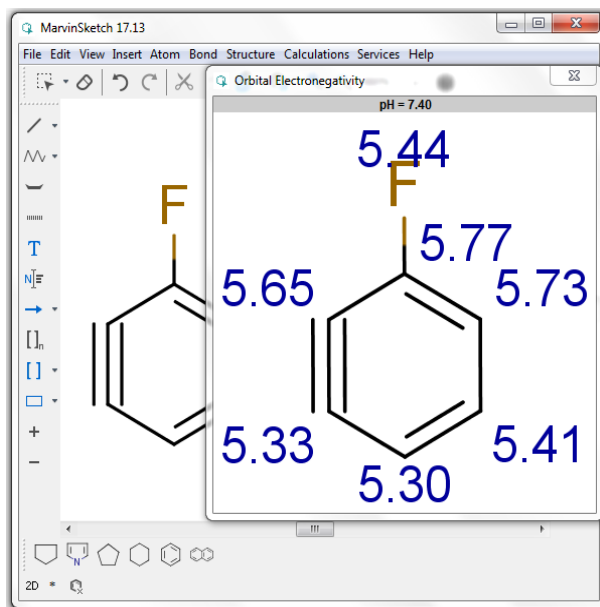

## S2. Computational details.

All calculations were done using Gaussian 09 software package.<sup>1</sup> For some of the structures with other possible conformations (e.g., 3-methoxybenzyne, Fig. S14), the relative free energies of all conformers have been calculated and the most stable conformer has been selected for the future analysis. Charge analysis were calculated using natural bond orbital (NBO) approach with NBO 3.1 code integrated in Gaussian 09 package.<sup>2</sup> The B3LYP functional of density functional theory is used for the charge and also the orbital contribution analysis calculations.<sup>3</sup> For finding the transition state the Hartree-Fock (HF) method has been used. All the calculations were carried out using the 6-31G\* basis set. The frequency calculation performed for all optimized structures to confirm the presence of one imaginary frequency for transition states and no imaginary frequency for minimum structures. Moreover, the correctness of TS structures is checked using the intrinsic reaction coordinate (IRC). For orbital contribution analysis, the Hirshfeld population analysis method is used which showed the lowest basis set dependency.<sup>4,5</sup>

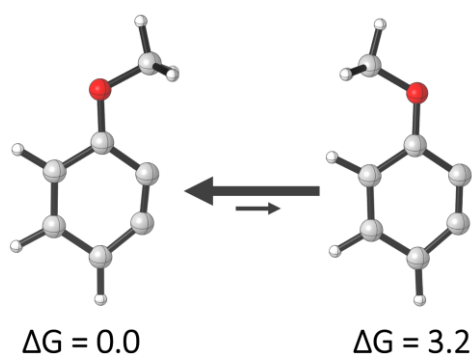

**Fig. S14.** Relative free energies ( $\Delta G$ , kcal.mol<sup>-1</sup>) of 3-methoxybenzyne conformers (B3LYP/6-31G\*).

## S2. References.

- 1) M. J. Frisch, G. W. Trucks, H. B. Schlegel, G. E. Scuseria, M. A. Robb, J. R. Cheeseman, J. A. Montgomery, T. Vreven Jr., K. N. Kudin, J. C. Burant, J. M. Millam, S. S. Iyengar, J. Tomasi, V. Barone, B. Mennucci, M. Cossi, G. Scalmani, N. Rega, G. A. Petersson, H. Nakatsuji, M. Hada, M. Ehara, K. Toyota, R. Fukuda, J. Hasegawa, M. Ishida, T. Nakajima, Y. Honda, O. Kitao, H. Nakai, M. Klene, X. Li, J. E. Knox, H. P. Hratchian, J. B. Cross, C. Adamo, J. Jaramillo, R. Gomperts, R. E. Stratmann, O. Yazyev, A. J. Austin, R. Cammi, C. Pomelli, J. W. Ochterski, P. Y. Ayala, K. Morokuma, G. A. Voth, P. Salvador, J. J. Dannenberg, V. G. Zakrzewski, S. Dapprich, A. D. Daniels, M. C. Strain, O. Farkas, D. K. Malick, A. D. Rabuck, K. Raghavachari, J. B. Foresman, J. V. Ortiz, Q. Cui, A. G. Baboul, S. Clifford, J. Cioslowski, B. B. Stefanov, G. Liu, A. Liashenko, P. Piskorz, I. Komaromi, R. L. Martin, D. J. Fox, T. Keith, M. A. Al-Laham, C. Y. Peng, A. Nanayakkara, M. Challacombe, P. M. W. Gill, B. Johnson, W. Chen, M. W. Wong, C. Gonzalez and J. A. Pople, Gaussian-09 suite of programs, Gaussian, Inc., Pittsburgh, PA, 2009.
- 2) J. P. Foster and F. Weinhold, *J. Am. Chem. Soc.*, 1980, **102**, 7211.
- 3) A. D. Becke, *Phys. Rev. A: At., Mol., Opt. Phys.*, 1988, **38**, 3098.
- 4) F. L. Hirshfeld, *Theoret. Chim Acta*, 1977, **44**, 129.
- 5) S. Mirzaei and H. Khosravi, *Tetrahedron Lett.*, 2017, **58**, 3362.

**S3.** Cartesian coordinates of all optimized structures (B3LYP/6-31G\*).

**3-methoxybenzyne**

|   |             |             |             |
|---|-------------|-------------|-------------|
| C | -0.01995172 | -1.09220863 | 0.00006372  |
| C | 1.91434565  | 0.82517077  | -0.00015911 |
| C | -0.47383697 | 0.22912693  | 0.00031977  |
| C | 1.21459598  | -1.31294640 | -0.00003464 |
| C | 2.34066250  | -0.52747992 | 0.00005044  |
| C | 0.56386235  | 1.19417600  | 0.00001279  |
| H | 2.67215417  | 1.60605219  | -0.00040370 |
| H | 3.37982821  | -0.83091368 | -0.00006424 |
| H | 0.28635124  | 2.24437862  | -0.00014477 |
| O | -1.75837546 | 0.65063711  | 0.00014411  |
| C | -2.74726441 | -0.37416275 | -0.00020115 |
| H | -2.65661637 | -1.00502020 | -0.89274161 |
| H | -3.71213006 | 0.13549291  | -0.00040942 |
| H | -2.65706375 | -1.00514274 | 0.89229998  |

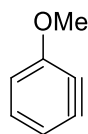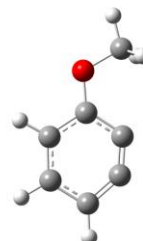

**3-FluoroBenzyne**

|   |             |             |            |
|---|-------------|-------------|------------|
| C | -1.24732500 | 0.35957200  | 0.00000000 |
| C | 0.92528700  | -1.30404200 | 0.00000000 |
| C | 0.00000000  | 0.95959800  | 0.00000000 |
| C | -1.28969200 | -0.89418600 | 0.00000000 |
| C | -0.35807000 | -1.90228000 | 0.00000000 |
| C | 1.10477000  | 0.08786300  | 0.00000000 |
| H | 1.80005600  | -1.95041300 | 0.00000000 |
| H | -0.52036000 | -2.97261400 | 0.00000000 |
| H | 2.10418600  | 0.51244700  | 0.00000000 |
| F | 0.20070000  | 2.28571400  | 0.00000000 |

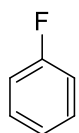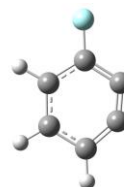

**3-ChloroBenzyne**

|    |             |             |            |
|----|-------------|-------------|------------|
| C  | 1.27445600  | -0.01007000 | 0.00000000 |
| C  | -0.73431300 | -1.82140500 | 0.00000000 |
| C  | 0.00000000  | 0.52234400  | 0.00000000 |
| C  | 1.45719500  | -1.24885200 | 0.00000000 |
| C  | 0.59115100  | -2.31734400 | 0.00000000 |
| C  | -1.02613800 | -0.44785400 | 0.00000000 |
| H  | -1.55720700 | -2.53273400 | 0.00000000 |
| H  | 0.83106200  | -3.37375200 | 0.00000000 |
| H  | -2.06081000 | -0.11827000 | 0.00000000 |
| Cl | -0.38748000 | 2.23316700  | 0.00000000 |

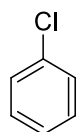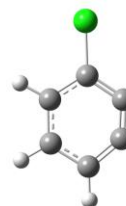

**3-BromoBenzyne**

|   |             |            |            |
|---|-------------|------------|------------|
| C | 0.40519500  | 1.45986200 | 0.00000000 |
| C | -2.26508900 | 1.09240600 | 0.00000000 |
| C | 0.00000000  | 0.14302600 | 0.00000000 |
| C | -0.41354200 | 2.40690300 | 0.00000000 |

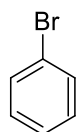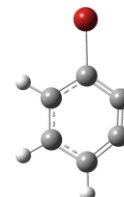

|    |             |             |            |
|----|-------------|-------------|------------|
| C  | -1.79014200 | 2.42556700  | 0.00000000 |
| C  | -1.40294400 | -0.01645700 | 0.00000000 |
| H  | -3.33929300 | 0.92146300  | 0.00000000 |
| H  | -2.44499400 | 3.28885300  | 0.00000000 |
| H  | -1.81732100 | -1.02009600 | 0.00000000 |
| Br | 1.15430700  | -1.37880200 | 0.00000000 |

### 3-IodoBenzyne

|   |             |             |            |
|---|-------------|-------------|------------|
| C | -1.02388000 | 1.51909000  | 0.00000000 |
| C | 1.43232400  | 2.59979000  | 0.00000000 |
| C | 0.00000000  | 0.60208100  | 0.00000000 |
| C | -0.83815300 | 2.75718400  | 0.00000000 |
| C | 0.33113300  | 3.48742400  | 0.00000000 |
| C | 1.27905800  | 1.20132300  | 0.00000000 |
| H | 2.43786600  | 3.01491700  | 0.00000000 |
| H | 0.43980500  | 4.56575500  | 0.00000000 |
| H | 2.16308800  | 0.57066100  | 0.00000000 |
| I | -0.22874800 | -1.53118300 | 0.00000000 |

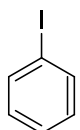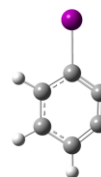

### 5-chloro-3-(trimethylsilyl)benzyne

|    |             |             |             |
|----|-------------|-------------|-------------|
| C  | -1.60858360 | -1.23330870 | -0.17875558 |
| C  | 1.10912052  | -2.41580030 | -0.08867863 |
| C  | -1.18441768 | -2.54650160 | -0.27802641 |
| C  | -0.07598090 | -3.12623673 | -0.25110141 |
| C  | 0.86016675  | -1.03229376 | 0.03079611  |
| Si | -3.38154166 | -0.56276305 | -0.24756616 |
| C  | -4.36614565 | -1.35208245 | 1.15971997  |
| C  | -3.32894329 | 1.31577233  | -0.05517941 |
| C  | -4.13019365 | -1.04377603 | -1.91522013 |
| C  | -0.42755947 | -0.45751073 | -0.01048660 |
| H  | 2.11604512  | -2.81864496 | -0.05191495 |
| H  | -5.41300012 | -1.02514104 | 1.13902233  |
| H  | -3.95143421 | -1.08409851 | 2.13824440  |
| H  | -4.35849168 | -2.44587231 | 1.08464598  |
| H  | -4.34345761 | 1.73082061  | -0.09148081 |
| H  | -2.88733922 | 1.61624160  | 0.90221473  |
| H  | -2.75227041 | 1.79257336  | -0.85643497 |
| H  | -5.17298036 | -0.71150040 | -1.98878993 |
| H  | -3.57651045 | -0.59426443 | -2.74749718 |
| H  | -4.11743797 | -2.13085697 | -2.05722455 |
| H  | -0.50836274 | 0.62087392  | 0.09127159  |
| Cl | 2.24255174  | 0.04352479  | 0.24448310  |

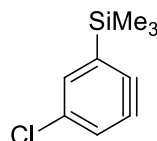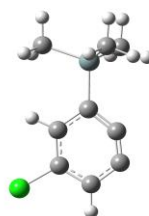

### 5-fluoro-3-(trimethylsilyl)benzyne

|   |             |             |             |
|---|-------------|-------------|-------------|
| C | -0.83780025 | -0.55982296 | -0.04437981 |
| C | 2.05181175  | -1.22998696 | -0.04445781 |
| C | -0.18781125 | -1.78478896 | -0.04429481 |

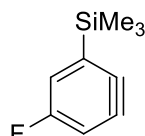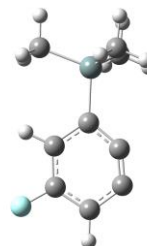



|    |             |             |             |
|----|-------------|-------------|-------------|
| C  | 1.00793675  | -2.15114596 | -0.04432081 |
| C  | 1.55497675  | 0.08538604  | -0.04446981 |
| Si | -2.70352725 | -0.22783896 | -0.04435181 |
| C  | -3.44824625 | -1.01501296 | 1.50494219  |
| C  | -2.99393625 | 1.63951804  | -0.04447381 |
| C  | -3.44834525 | -1.01516996 | -1.59352081 |
| C  | 0.18693775  | 0.42327504  | -0.04440581 |
| H  | 3.11878675  | -1.42992896 | -0.04444381 |
| H  | -4.53727125 | -0.88544496 | 1.52648919  |
| H  | -3.04005325 | -0.56594796 | 2.41770919  |
| H  | -3.24092725 | -2.09090296 | 1.54329219  |
| H  | -4.06901025 | 1.85664804  | -0.04485181 |
| H  | -2.56356225 | 2.12012004  | 0.84194719  |
| H  | -2.56296125 | 2.12007504  | -0.93062881 |
| H  | -4.53734525 | -0.88539096 | -1.61510981 |
| H  | -3.04004925 | -0.56635296 | -2.50636281 |
| H  | -3.24123725 | -2.09110796 | -1.63166881 |
| H  | -0.06417925 | 1.48044104  | -0.04437981 |
| F  | 2.44845575  | 1.10046304  | -0.04442781 |

### 5-methyl-3-(trimethylsilyl)benzyne

|    |             |             |             |
|----|-------------|-------------|-------------|
| C  | 0.87176503  | 0.27776924  | -0.05028342 |
| C  | -1.97979588 | 1.01010693  | 0.02502543  |
| C  | 0.26973910  | 1.52555357  | -0.05538302 |
| C  | -0.91917486 | 1.91194799  | -0.02561870 |
| C  | -1.56187523 | -0.34182990 | 0.03799642  |
| C  | -2.59712972 | -1.44729775 | 0.09205889  |
| Si | 2.72001174  | -0.12045241 | -0.10064348 |
| C  | 3.54956395  | 0.66526948  | 1.40703762  |
| C  | 2.95149612  | -1.99759807 | -0.07187904 |
| C  | 3.45254357  | 0.60569394  | -1.68642700 |
| C  | -0.18723283 | -0.67316534 | 0.00125248  |
| H  | -3.03511857 | 1.27097653  | 0.05298434  |
| H  | -2.47351013 | -2.07179661 | 0.98526592  |
| H  | -3.61178321 | -1.03735806 | 0.11289656  |
| H  | -2.52504846 | -2.10989114 | -0.77904039 |
| H  | 4.63321845  | 0.49506786  | 1.39555926  |
| H  | 3.15547888  | 0.24974967  | 2.34172655  |
| H  | 3.38323687  | 1.74871245  | 1.43067359  |
| H  | 4.01828552  | -2.25068558 | -0.10118277 |
| H  | 2.53326736  | -2.44643881 | 0.83680424  |
| H  | 2.47660972  | -2.48039178 | -0.93413670 |
| H  | 4.53492292  | 0.43435973  | -1.73649970 |
| H  | 3.00088358  | 0.15537420  | -2.57794940 |
| H  | 3.28416340  | 1.68770579  | -1.74101609 |
| H  | 0.07893781  | -1.72932406 | 0.01320786  |

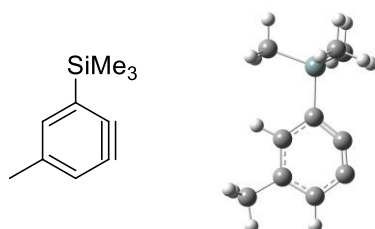

### 5-methoxy-3-(trimethylsilyl)benzyne

|    |             |             |             |
|----|-------------|-------------|-------------|
| C  | 0.63824012  | -0.24808087 | 0.02095951  |
| C  | -2.16925088 | -1.18947087 | 0.02108651  |
| C  | 0.12126212  | -1.53862187 | 0.02079951  |
| C  | -1.03749788 | -2.00318387 | 0.02075651  |
| C  | -1.82428788 | 0.18416713  | 0.02107751  |
| Si | 2.45727612  | 0.27403013  | 0.02087251  |
| C  | 3.28403512  | -0.43235387 | -1.52702549 |
| C  | 2.55779312  | 2.16176113  | 0.02109851  |
| C  | 3.28432412  | -0.43276587 | 1.56842751  |
| C  | -0.47297688 | 0.62663513  | 0.02095251  |
| H  | -3.19692888 | -1.53443287 | 0.02097451  |
| H  | 4.35402312  | -0.19148287 | -1.54936649 |
| H  | 2.83123812  | -0.03006687 | -2.44062949 |
| H  | 3.18810712  | -1.52398687 | -1.56339749 |
| H  | 3.60401712  | 2.49085613  | 0.02119251  |
| H  | 2.07786912  | 2.59414613  | -0.86468949 |
| H  | 2.07777212  | 2.59395513  | 0.90692651  |
| H  | 4.35430112  | -0.19183287 | 1.59066851  |
| H  | 2.83164912  | -0.03078187 | 2.48222451  |
| H  | 3.18847212  | -1.52441487 | 1.60448651  |
| H  | -0.31715388 | 1.70228913  | 0.02086351  |
| O  | -2.74571388 | 1.19645413  | 0.02095051  |
| C  | -4.12027188 | 0.85027813  | 0.02069851  |
| H  | -4.39214688 | 0.27391113  | 0.91527651  |
| H  | -4.66746788 | 1.79488413  | 0.02043451  |
| H  | -4.39175488 | 0.27363513  | -0.87382049 |

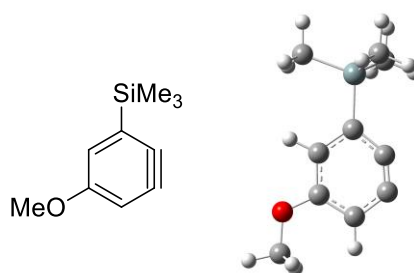

### 5-phenyl-3-(trimethylsilyl)benzyne

|    |             |             |             |
|----|-------------|-------------|-------------|
| C  | 1.46801716  | -0.39298076 | -0.05038372 |
| C  | -0.94064484 | 1.27982124  | -0.35866872 |
| C  | 1.34580416  | 0.96669024  | -0.27889972 |
| C  | 0.37044316  | 1.73745424  | -0.41966072 |
| C  | -1.03050784 | -0.11876876 | -0.11926772 |
| Si | 3.05814416  | -1.40185976 | 0.13853128  |
| C  | 3.99989516  | -0.77185076 | 1.65320228  |
| C  | 2.61254516  | -3.22686976 | 0.35516228  |
| C  | 4.10585316  | -1.16059876 | -1.41741772 |
| C  | 0.14044316  | -0.90340476 | 0.02682628  |
| H  | -1.83302084 | 1.88223624  | -0.50162272 |
| H  | 4.94949316  | -1.30674676 | 1.77772528  |
| H  | 3.41645916  | -0.90783776 | 2.57116828  |
| H  | 4.22927716  | 0.29633824  | 1.56176328  |
| H  | 3.52234416  | -3.83117376 | 0.45556228  |
| H  | 2.00657416  | -3.39689076 | 1.25290428  |
| H  | 2.05493416  | -3.61511776 | -0.50526972 |
| H  | 5.06215616  | -1.69166576 | -1.33573072 |
| H  | 3.58994716  | -1.53562376 | -2.30890372 |

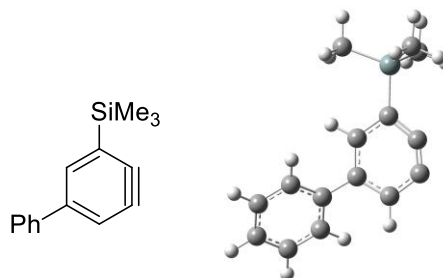

|   |             |             |             |
|---|-------------|-------------|-------------|
| H | 4.32785816  | -0.10009276 | -1.58518872 |
| H | 0.01475916  | -1.96401576 | 0.23167428  |
| C | -2.37107084 | -0.75980476 | -0.02522772 |
| C | -2.62886984 | -1.99834776 | -0.63740372 |
| C | -3.41782984 | -0.13487476 | 0.67322028  |
| C | -3.88737184 | -2.59184476 | -0.55128472 |
| H | -1.84105184 | -2.48624976 | -1.20478272 |
| C | -4.67795084 | -0.72628076 | 0.75612928  |
| H | -3.23305884 | 0.81073324  | 1.17543428  |
| C | -4.91820884 | -1.95803176 | 0.14510628  |
| H | -4.06508284 | -3.54777476 | -1.03718172 |
| H | -5.47052884 | -0.22729876 | 1.30768428  |
| H | -5.89945984 | -2.42019776 | 0.21100828  |

#### 4,5-indolyne

|   |             |             |            |
|---|-------------|-------------|------------|
| C | 0.64029882  | -1.43934965 | 0.00647917 |
| C | 1.33745482  | 1.18640635  | 0.00647917 |
| C | 1.83163282  | -1.07206565 | 0.00647917 |
| C | -0.46164118 | -0.58313065 | 0.00647917 |
| C | -0.01677318 | 0.79124035  | 0.00647917 |
| C | 2.35760682  | 0.22105235  | 0.00647917 |
| N | -1.16427018 | 1.56059435  | 0.00647917 |
| C | -2.27546318 | 0.74218335  | 0.00647917 |
| C | -1.88894718 | -0.57585065 | 0.00647917 |
| H | 1.59913282  | 2.24202335  | 0.00647917 |
| H | 3.40691982  | 0.49509335  | 0.00647917 |
| H | -1.19165318 | 2.56832435  | 0.00647917 |
| H | -3.26792218 | 1.17095235  | 0.00647917 |
| H | -2.54799218 | -1.43204865 | 0.00647917 |

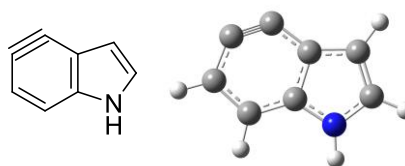

#### 3-bromo-4,5-indolyne

|    |             |             |            |
|----|-------------|-------------|------------|
| C  | 0.18414312  | 2.92454006  | 0.04076794 |
| C  | 2.76637012  | 3.81862206  | 0.04076794 |
| C  | 0.48149512  | 4.13491206  | 0.04076794 |
| C  | 1.13323712  | 1.90425306  | 0.04076794 |
| C  | 2.47316912  | 2.43788806  | 0.04076794 |
| C  | 1.72707112  | 4.76202606  | 0.04076794 |
| N  | 3.32507012  | 1.35080906  | 0.04076794 |
| C  | 2.59517812  | 0.17984906  | 0.04076794 |
| C  | 1.25695112  | 0.48465406  | 0.04076794 |
| H  | 3.79932312  | 4.15843806  | 0.04076794 |
| H  | 1.91808212  | 5.82921406  | 0.04076794 |
| H  | 4.33249712  | 1.39557406  | 0.04076794 |
| H  | 3.07914212  | -0.78538794 | 0.04076794 |
| Br | -0.15959788 | -0.75470794 | 0.04076794 |

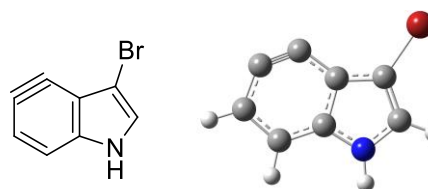

### 6-bromo-4,5-indolyne

|    |             |             |            |
|----|-------------|-------------|------------|
| C  | 1.22022000  | 1.56123500  | 0.00000000 |
| C  | 0.00000000  | -0.82544600 | 0.00000000 |
| C  | -0.02579700 | 1.51767200  | 0.00000000 |
| C  | 2.13736500  | 0.51944100  | 0.00000000 |
| C  | 1.40677000  | -0.72862600 | 0.00000000 |
| C  | -0.76982300 | 0.34585100  | 0.00000000 |
| N  | 2.36330400  | -1.72323400 | 0.00000000 |
| C  | 3.62399300  | -1.16065000 | 0.00000000 |
| C  | 3.52919900  | 0.20921900  | 0.00000000 |
| H  | -0.49286400 | -1.79260700 | 0.00000000 |
| H  | 2.17400100  | -2.71363500 | 0.00000000 |
| H  | 4.50155500  | -1.79172800 | 0.00000000 |
| H  | 4.35451000  | 0.90604100  | 0.00000000 |
| Br | -2.68034000 | 0.25206900  | 0.00000000 |

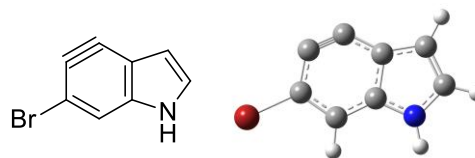

### 5,6-indolyne

|   |             |             |            |
|---|-------------|-------------|------------|
| C | -0.83423100 | -1.65507300 | 0.00000000 |
| C | -1.29192700 | 1.27615400  | 0.00000000 |
| C | -2.02217000 | -0.96287400 | 0.00000000 |
| C | 0.24800900  | -0.72951300 | 0.00000000 |
| C | 0.00000000  | 0.69192100  | 0.00000000 |
| C | -2.24028300 | 0.27393800  | 0.00000000 |
| N | 1.23582300  | 1.30838300  | 0.00000000 |
| C | 2.23526500  | 0.35251400  | 0.00000000 |
| C | 1.67576500  | -0.89684600 | 0.00000000 |
| H | -0.69023400 | -2.73065300 | 0.00000000 |
| H | -1.45965600 | 2.34956600  | 0.00000000 |
| H | 1.38562000  | 2.30485800  | 0.00000000 |
| H | 3.27524800  | 0.64973900  | 0.00000000 |
| H | 2.21569500  | -1.83351600 | 0.00000000 |

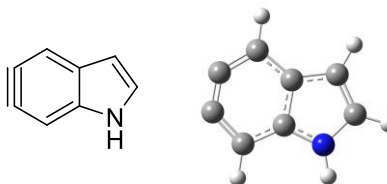

### 6,7-indolyne

|   |             |             |            |
|---|-------------|-------------|------------|
| C | 0.65318100  | -1.63781800 | 0.00000000 |
| C | 1.36845300  | 1.04294100  | 0.00000000 |
| C | 1.82241400  | -1.19276200 | 0.00000000 |
| C | -0.38316100 | -0.70615900 | 0.00000000 |
| C | 0.00000000  | 0.68188100  | 0.00000000 |
| C | 2.38777500  | 0.07437000  | 0.00000000 |
| C | -2.26008300 | 0.52776600  | 0.00000000 |
| H | 1.64972300  | 2.09347600  | 0.00000000 |
| H | 3.44076400  | 0.32800900  | 0.00000000 |
| H | -1.33319500 | 2.50564200  | 0.00000000 |
| H | -3.32804200 | 0.69512500  | 0.00000000 |
| H | -2.30321500 | -1.60813000 | 0.00000000 |
| N | -1.75599800 | -0.76164800 | 0.00000000 |
| C | -1.22758800 | 1.42935100  | 0.00000000 |

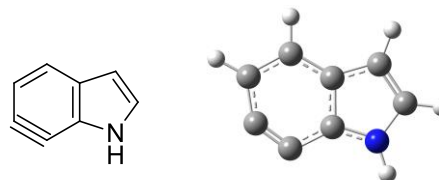

### 3,4-pyridyne

|   |             |             |             |
|---|-------------|-------------|-------------|
| C | 1.17312054  | -0.05009640 | 0.01487039  |
| C | 0.41253023  | -1.21305721 | 0.00241269  |
| C | -0.84565573 | -1.24169654 | -0.01693514 |
| C | -1.67104741 | -0.13852230 | -0.02889263 |
| C | -0.88273288 | 1.04644060  | -0.01600236 |
| N | 0.44834257  | 1.08522163  | 0.00447979  |
| H | 2.25494216  | 0.02648662  | 0.03154394  |
| H | -2.75518712 | -0.10393602 | -0.04552843 |
| H | -1.38822797 | 2.01032097  | -0.02313250 |

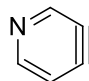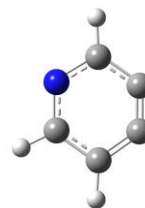

### 5-bromo-3,4-pyridyne

|    |            |             |             |
|----|------------|-------------|-------------|
| C  | 2.04419932 | 3.25466502  | -0.16387685 |
| N  | 3.33571764 | 0.94834027  | -0.05049318 |
| C  | 3.41321935 | 3.38688374  | -0.22423567 |
| C  | 1.38883244 | 2.18698341  | -0.06461269 |
| C  | 2.00216871 | 0.95019134  | -0.00085147 |
| C  | 4.00666196 | 2.09520938  | -0.15588678 |
| H  | 4.00794804 | 4.28869649  | -0.30961551 |
| H  | 5.09086621 | 2.01289277  | -0.19058473 |
| Br | 1.09544082 | -0.71236433 | 0.14947235  |

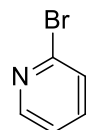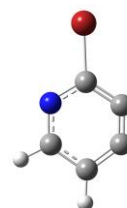

### 2-sulfamate-3,4-pyridyne

|   |             |             |             |
|---|-------------|-------------|-------------|
| C | 0.45288934  | -1.12761540 | 0.08375883  |
| N | -0.33924909 | 1.38229065  | 0.17177923  |
| C | 1.48871486  | -0.24179724 | 0.27610167  |
| C | -0.77251348 | -0.89140067 | -0.04912426 |
| C | -1.23994701 | 0.41467215  | -0.01006722 |
| C | 0.95068443  | 1.07259342  | 0.30709403  |
| O | -2.53470535 | 0.84369779  | -0.13728597 |
| S | -3.76112659 | -0.31067929 | -0.37156425 |
| N | -5.04611713 | 0.72172602  | -0.45247953 |
| C | -5.13904871 | 1.56013272  | -1.65693122 |
| C | -5.43893877 | 1.37962340  | 0.80255334  |
| O | -3.54460957 | -0.91213211 | -1.67511907 |
| O | -3.85198114 | -1.09716287 | 0.84543098  |
| H | 2.54733659  | -0.43817012 | 0.39144252  |
| H | 1.62847024  | 1.91141346  | 0.45210396  |
| H | -4.88304424 | 0.96529363  | -2.53324399 |
| H | -6.17664722 | 1.89373184  | -1.74698836 |
| H | -4.47935069 | 2.43577950  | -1.59687668 |
| H | -4.79953222 | 2.24314854  | 1.02849653  |
| H | -5.38931137 | 0.66052452  | 1.61970093  |
| H | -6.47370790 | 1.71485679  | 0.68906164  |

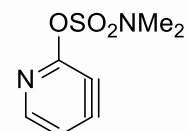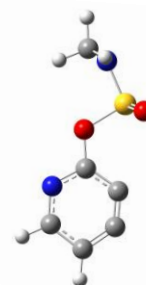

### 2,3-pyridyne

|   |             |             |             |
|---|-------------|-------------|-------------|
| C | 1.26598582  | -0.46777355 | -0.17218085 |
| C | 1.32290896  | 0.95585986  | -0.16258081 |
| C | 0.02426829  | -0.72525478 | -0.02964257 |
| C | 0.11895782  | 1.68470397  | -0.01319560 |
| H | 0.13500342  | 2.77035766  | -0.00266872 |
| H | 2.26728326  | 1.48997898  | -0.26712068 |
| C | -1.10719359 | 1.02718736  | 0.12294736  |
| N | -1.17539222 | -0.35285862 | 0.11516648  |
| H | -2.05177452 | 1.54794914  | 0.23956657  |

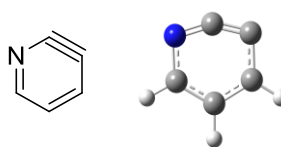

### 4,5-benzofuranyne

|   |             |             |            |
|---|-------------|-------------|------------|
| C | 0.61143800  | -1.65532200 | 0.00000000 |
| C | 1.34662000  | 0.97586300  | 0.00000000 |
| C | 1.80310200  | -1.28456600 | 0.00000000 |
| C | -0.46461600 | -0.76851600 | 0.00000000 |
| C | 0.00000000  | 0.57863700  | 0.00000000 |
| C | 2.35461200  | -0.00508900 | 0.00000000 |
| C | -2.19511500 | 0.63094200  | 0.00000000 |
| C | -1.89927800 | -0.69474200 | 0.00000000 |
| H | 1.60091800  | 2.03126100  | 0.00000000 |
| H | 3.40850800  | 0.24893500  | 0.00000000 |
| H | -3.13210300 | 1.16776200  | 0.00000000 |
| H | -2.60636300 | -1.51160300 | 0.00000000 |
| O | -1.07644100 | 1.42505100  | 0.00000000 |

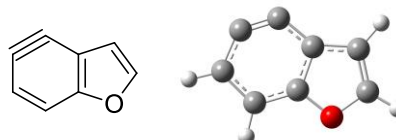

### 3,5-dimethoxybenzyne

|   |             |             |             |
|---|-------------|-------------|-------------|
| C | 0.81998075  | 1.40613269  | -0.01453772 |
| C | -1.54651025 | 0.03844169  | -0.01497072 |
| C | 0.91720275  | 0.00669369  | -0.01447972 |
| C | -0.31559625 | 1.92934769  | -0.01459572 |
| C | -1.60751525 | 1.46090069  | -0.01500672 |
| C | -0.31892425 | -0.66195331 | -0.01474772 |
| H | -2.52465725 | 2.03241769  | -0.01537172 |
| H | -0.34355225 | -1.74621831 | -0.01489372 |
| O | 2.05716475  | -0.72112431 | -0.01412372 |
| C | 3.26910975  | 0.02571469  | -0.01562972 |
| H | 3.34007375  | 0.65646869  | -0.91012272 |
| H | 4.07694375  | -0.70793531 | -0.01293772 |
| H | 3.33895675  | 0.66185069  | 0.87512528  |
| O | -2.65935625 | -0.75285331 | -0.01509272 |

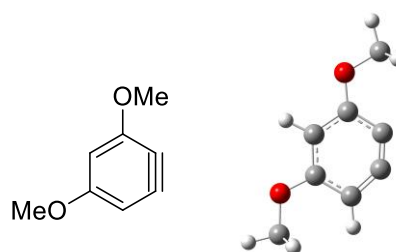

|   |             |             |             |
|---|-------------|-------------|-------------|
| C | -3.93131325 | -0.12599431 | -0.01493272 |
| H | -4.07579425 | 0.49328969  | -0.91025372 |
| H | -4.66336925 | -0.93558031 | -0.01466072 |
| H | -4.07546025 | 0.49350469  | 0.88027328  |

#### 4-methoxybenzyne

|   |             |             |             |
|---|-------------|-------------|-------------|
| C | -1.09067277 | 0.23101745  | 0.08947834  |
| C | 1.46200623  | -0.53134355 | 0.09003034  |
| C | -0.93235777 | -1.15094755 | 0.08980634  |
| C | -0.17605377 | 1.07978945  | 0.08965034  |
| C | 1.19149323  | 0.86058045  | 0.09016834  |
| C | 0.42345923  | -1.50160855 | 0.08980534  |
| H | 1.96795323  | 1.61540745  | 0.09018334  |
| H | 0.72080523  | -2.54629755 | 0.08963134  |
| O | 2.72484323  | -1.05338255 | 0.08990734  |
| C | 3.82244823  | -0.15504655 | 0.09003234  |
| H | 3.82245723  | 0.48123745  | 0.98515834  |
| H | 4.71878423  | -0.77783955 | 0.08991134  |
| H | 3.82242623  | 0.48153345  | -0.80488266 |
| H | -1.72263477 | -1.89471455 | 0.08953534  |

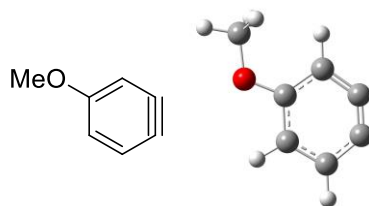

#### 4-fluoro benzyne

|   |             |             |             |
|---|-------------|-------------|-------------|
| C | 1.78248700  | 0.34489200  | 0.00080200  |
| C | -0.80975700 | -0.05064600 | -0.00054200 |
| C | 1.44882600  | -1.00163500 | -0.00045200 |
| C | 1.00416900  | 1.32248100  | 0.00067800  |
| C | -0.37843600 | 1.28944600  | -0.00085800 |
| C | 0.05236600  | -1.16474100 | -0.00009500 |
| H | -1.08065900 | 2.11567600  | -0.00055700 |
| H | -0.39284200 | -2.15502600 | 0.00046100  |
| H | 2.13415000  | -1.84277500 | 0.00011200  |
| F | -2.13984200 | -0.28407300 | 0.00031000  |

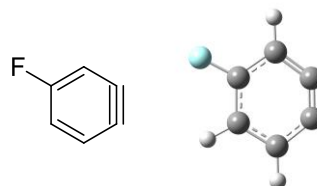

#### 7,8-quinolyne

|   |             |             |             |
|---|-------------|-------------|-------------|
| C | -1.30657778 | 0.87127457  | -0.16110778 |
| N | -1.06642645 | -1.93692208 | 0.07793014  |
| C | -2.41341652 | 0.05183313  | -0.20802789 |
| C | -0.01901913 | 0.30528177  | 0.00991270  |
| C | 0.02705424  | -1.14913008 | 0.12595175  |
| C | -2.23751278 | -1.34501623 | -0.08353007 |
| C | 1.36345962  | -1.56576878 | 0.29036753  |
| C | 2.36691812  | -0.83649816 | 0.33395019  |

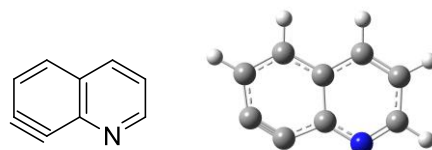

|   |             |             |             |
|---|-------------|-------------|-------------|
| C | 2.43652549  | 0.56144266  | 0.23370718  |
| C | 1.16868267  | 1.10474479  | 0.06638030  |
| H | -1.40989282 | 1.94978762  | -0.25401111 |
| H | -3.41066423 | 0.46084058  | -0.33823678 |
| H | -3.10543812 | -2.00238569 | -0.11918758 |
| H | 3.33406012  | 1.16891051  | 0.27612462  |
| H | 1.06127277  | 2.18356596  | -0.02695259 |

### 3,4-oxacyclohexyne

|   |             |             |             |
|---|-------------|-------------|-------------|
| C | 0.66814672  | 1.26806434  | 0.11565878  |
| C | 0.88818234  | -1.04382227 | 0.16359203  |
| C | -1.31368188 | -0.03733346 | 0.03163910  |
| O | -0.38676333 | -1.04436099 | -0.43592387 |
| C | -0.55732533 | 1.24817454  | 0.11891108  |
| C | 1.73453696  | 0.29131516  | -0.07330894 |
| H | 0.81407670  | -1.19316601 | 1.25136123  |
| H | 1.42187124  | -1.88745493 | -0.28369030 |
| H | -1.71817445 | -0.31369590 | 1.01596217  |
| H | -2.12732462 | -0.04263353 | -0.69768764 |
| H | 2.55666654  | 0.31974461  | 0.65115368  |
| H | 2.16120003  | 0.32335880  | -1.08263898 |

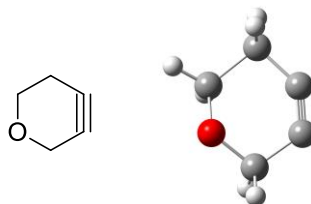

### 3,4-piperidyne

|   |             |             |             |
|---|-------------|-------------|-------------|
| C | 1.27248699  | 0.78365633  | -0.50032927 |
| C | 0.12174099  | -0.81911867 | 0.79942673  |
| C | -0.87464701 | 1.39638633  | 0.44018673  |
| C | 0.39858299  | 1.63140033  | -0.33832827 |
| C | 1.36259699  | -0.64787367 | -0.21985427 |
| H | 0.48085499  | -0.49307067 | 1.78140173  |
| H | -0.13894701 | -1.88098967 | 0.86205373  |
| H | -0.75442801 | 1.77994233  | 1.45997273  |
| H | -1.76818301 | 1.86042833  | 0.01268473  |
| H | 2.27663299  | -0.98420767 | 0.28400873  |
| H | 1.23356399  | -1.26564867 | -1.11782127 |
| N | -1.07804401 | -0.06714167 | 0.48110973  |
| C | -1.77820501 | -0.56986567 | -0.70197627 |
| H | -1.94386101 | -1.64649667 | -0.59325027 |
| H | -2.75705101 | -0.08548367 | -0.77815027 |
| H | -1.23240701 | -0.39252267 | -1.64295327 |

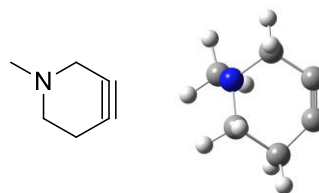



### 3-methoxycyclohexanyne

|   |             |             |             |
|---|-------------|-------------|-------------|
| C | -0.28324061 | -1.21688547 | 0.05549856  |
| C | -0.74451561 | 1.14036853  | -0.17096744 |
| C | -2.70021261 | -0.61738447 | -0.21100444 |
| C | -2.19081461 | 0.80435853  | 0.25207156  |
| C | -1.48841861 | -1.42635447 | -0.01369044 |
| C | 0.34007539  | 0.12936653  | 0.32212556  |
| O | 1.53206639  | 0.42221453  | -0.36427744 |
| C | 2.61777939  | -0.38572347 | 0.04615156  |
| H | -0.66791861 | 1.17141353  | -1.26436144 |
| H | -0.47883261 | 2.13852153  | 0.19901356  |
| H | -3.00496361 | -0.60370947 | -1.26496844 |
| H | -3.57141161 | -0.92049647 | 0.38049856  |
| H | -2.87030661 | 1.56735453  | -0.14865844 |
| H | -2.26944461 | 0.85007253  | 1.34558956  |
| H | 0.50430339  | 0.23201353  | 1.40853256  |
| H | 3.47535339  | -0.10933247 | -0.57196844 |
| H | 2.86798539  | -0.22112547 | 1.10658956  |
| H | 2.38768139  | -1.45200647 | -0.09739844 |

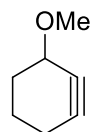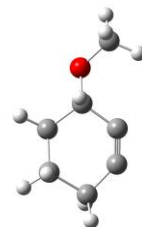

### 5-methoxy-3-fluorobenzynes

|   |             |             |             |
|---|-------------|-------------|-------------|
| C | 0.63705072  | -0.91265021 | 0.01148055  |
| C | -1.05102228 | 1.13481779  | 0.01122755  |
| C | 1.27534072  | 0.32009079  | 0.01118555  |
| C | -0.59488828 | -1.14098921 | 0.01138855  |
| C | -1.57396728 | -0.17150321 | 0.01089355  |
| C | 0.32928772  | 1.37349179  | 0.01135655  |
| H | -1.74714728 | 1.96933079  | 0.01144355  |
| H | 0.70576472  | 2.39293879  | 0.01157855  |
| O | 2.59875472  | 0.58947679  | 0.01126255  |
| C | 3.45339372  | -0.55042121 | 0.01139455  |
| H | 3.28585972  | -1.16379821 | 0.90566055  |
| H | 4.47452972  | -0.16664321 | 0.01144255  |
| H | 3.28598372  | -1.16390421 | -0.88282345 |
| F | -2.89815628 | -0.38824121 | 0.01140555  |

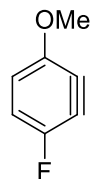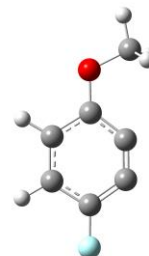

### 3-chloro-6-fluorobenzynes

|   |             |             |            |
|---|-------------|-------------|------------|
| C | -1.30295500 | -0.99895000 | 0.00000000 |
| C | 1.13760700  | 0.15543200  | 0.00000000 |
| C | -0.23442600 | -1.87319400 | 0.00000000 |
| C | -1.15115900 | 0.24339200  | 0.00000000 |

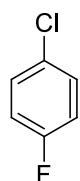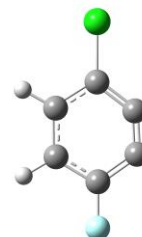

|    |             |             |            |
|----|-------------|-------------|------------|
| C  | 0.00000000  | 0.99340600  | 0.00000000 |
| C  | 1.02318900  | -1.24265500 | 0.00000000 |
| H  | 2.12229200  | 0.61454800  | 0.00000000 |
| H  | 1.91540200  | -1.86218200 | 0.00000000 |
| F  | -0.32684000 | -3.20678300 | 0.00000000 |
| Cl | 0.12178400  | 2.73200500  | 0.00000000 |

### 3-bromo-6-fluorobenzynes

|    |             |             |             |
|----|-------------|-------------|-------------|
| C  | 1.47617272  | -0.76815001 | -0.12685424 |
| C  | -1.04235491 | 0.22494645  | -0.05703756 |
| C  | 0.46491060  | -1.70555519 | -0.03980124 |
| C  | 1.22553645  | 0.45783457  | -0.16969379 |
| C  | 0.03480273  | 1.13505091  | -0.14585908 |
| C  | -0.83219843 | -1.16102366 | -0.00530409 |
| H  | -2.05460664 | 0.61766033  | -0.02869252 |
| H  | -1.67882599 | -1.83799994 | 0.06281415  |
| F  | 0.64522333  | -3.02950638 | 0.01053990  |
| Br | -0.22195832 | 3.01239184  | -0.21719321 |

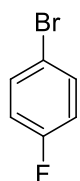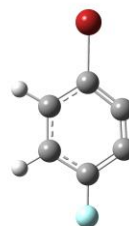

### 6-fluoro-3-iodobenzynes

|   |             |             |             |
|---|-------------|-------------|-------------|
| C | -0.39931131 | 4.14915783  | -0.15288552 |
| C | 1.70984160  | 2.43334362  | -0.05753976 |
| C | 0.85507132  | 4.72970239  | -0.10736455 |
| C | -0.51057854 | 2.90099668  | -0.14856365 |
| C | 0.40513031  | 1.88806824  | -0.10529623 |
| C | 1.92844728  | 3.82024685  | -0.05858856 |
| H | 2.56190586  | 1.76060132  | -0.01916424 |
| H | 2.94122817  | 4.21071385  | -0.02128849 |
| F | 1.08808698  | 6.04664399  | -0.10735508 |
| I | 0.01947440  | -0.20231486 | -0.10593532 |

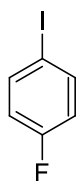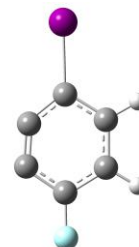

### 3-Chloro-5-methoxybenzynes

|   |             |             |            |
|---|-------------|-------------|------------|
| C | -1.72115705 | -1.83905464 | 0.02453395 |
| C | -0.12190905 | 0.31494536  | 0.02450595 |
| C | -2.40124405 | -0.62474364 | 0.02404395 |
| C | -0.47414505 | -1.94838764 | 0.02458095 |
| C | 0.48353295  | -0.96377164 | 0.02418595 |
| C | -1.51151805 | 0.47876436  | 0.02436295 |
| H | 0.51928495  | 1.19242636  | 0.02482395 |
| H | -1.93836105 | 1.47793236  | 0.02457295 |
| O | -3.73244205 | -0.41334764 | 0.02420395 |
| C | -4.54354805 | -1.58601064 | 0.02448095 |

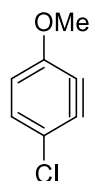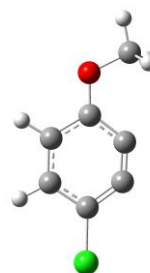

|    |             |             |             |
|----|-------------|-------------|-------------|
| H  | -4.35174805 | -2.19184764 | -0.86946105 |
| H  | -5.57798905 | -1.24000864 | 0.02456195  |
| H  | -4.35153805 | -2.19162064 | 0.91853095  |
| Cl | 2.21731295  | -1.17612464 | 0.02468895  |

### 3-bromo-5-methoxybenzyne

|    |             |            |             |
|----|-------------|------------|-------------|
| C  | 1.80446735  | 0.51875847 | -0.04346645 |
| C  | 0.27190235  | 2.73160047 | -0.04342845 |
| C  | 2.51834735  | 1.71489447 | -0.04323245 |
| C  | 0.55340135  | 0.46580747 | -0.04347745 |
| C  | -0.37471965 | 1.47300147 | -0.04327845 |
| C  | 1.66622535  | 2.84831647 | -0.04336445 |
| H  | -0.33988065 | 3.62956147 | -0.04356545 |
| H  | 2.12666635  | 3.83237847 | -0.04344645 |
| O  | 3.85550835  | 1.88429947 | -0.04326145 |
| C  | 4.63022935  | 0.68719747 | -0.04338145 |
| H  | 4.41959235  | 0.08759347 | 0.85044755  |
| H  | 5.67475235  | 1.00147247 | -0.04339045 |
| H  | 4.41954035  | 0.08772347 | -0.93728545 |
| Br | -2.26711665 | 1.30002347 | -0.04355245 |

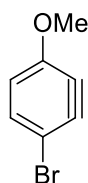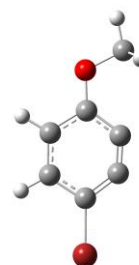

### 3-iodo-5-methoxybenzyne

|   |             |            |             |
|---|-------------|------------|-------------|
| C | 2.51610988  | 0.58010582 | -0.15523728 |
| C | 1.02208988  | 2.83578282 | -0.15516728 |
| C | 3.24678388  | 1.76812982 | -0.15550228 |
| C | 1.26305788  | 0.57607582 | -0.15521828 |
| C | 0.34781588  | 1.58942882 | -0.15539028 |
| C | 2.41994988  | 2.92072182 | -0.15528028 |
| H | 0.43686688  | 3.75152782 | -0.15496228 |
| H | 2.90121588  | 3.89477882 | -0.15512428 |
| O | 4.58665388  | 1.91140682 | -0.15531228 |
| C | 5.33898188  | 0.70068282 | -0.15510728 |
| H | 5.11699188  | 0.10475082 | 0.73846872  |
| H | 6.38923488  | 0.99545282 | -0.15499128 |
| H | 5.11721788  | 0.10462882 | -1.04865828 |
| I | -1.77458112 | 1.41192282 | -0.15522228 |

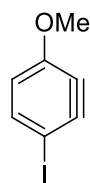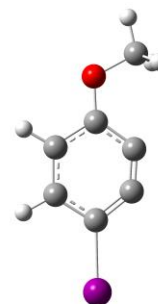

### 6-methoxy-4,5-indolyne

|   |             |             |             |
|---|-------------|-------------|-------------|
| C | -0.01267792 | 1.76220839  | -0.02318313 |
| C | 0.39839008  | -0.86089361 | -0.02291413 |
| C | 1.17435908  | 1.37438439  | -0.02308013 |
| C | -1.21637592 | 1.08083039  | -0.02308513 |

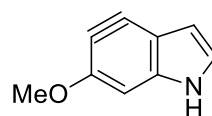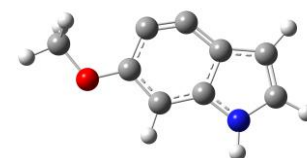

|   |             |             |             |
|---|-------------|-------------|-------------|
| C | -0.90688492 | -0.33215861 | -0.02303913 |
| C | 1.50457508  | 0.00610239  | -0.02275213 |
| N | -2.12624792 | -0.97881361 | -0.02325913 |
| C | -3.15439492 | -0.05213161 | -0.02303513 |
| C | -2.63861592 | 1.21832039  | -0.02302213 |
| H | 0.57287308  | -1.93263061 | -0.02297213 |
| H | -2.25181092 | -1.97894661 | -0.02347613 |
| H | -4.18391592 | -0.38107661 | -0.02303713 |
| H | -3.20550592 | 2.13793739  | -0.02300613 |
| O | 2.75450508  | -0.52475561 | -0.02312513 |
| C | 3.82234508  | 0.41434039  | -0.02317813 |
| H | 3.78658708  | 1.05236739  | -0.91508513 |
| H | 4.74278308  | -0.17248761 | -0.02406013 |
| H | 3.78759808  | 1.05126539  | 0.86955987  |

#### 6-Fluoro-4,5-indolyne

|   |             |             |             |
|---|-------------|-------------|-------------|
| C | -0.52236464 | -0.84385048 | -0.06652726 |
| C | 1.58595336  | 0.76424652  | -0.06652726 |
| C | 0.59834736  | -1.39501448 | -0.06652726 |
| C | -0.92081564 | 0.48075752  | -0.06652726 |
| C | 0.27699636  | 1.29024552  | -0.06652726 |
| C | 1.75867236  | -0.62170648 | -0.06652726 |
| N | -0.15730064 | 2.59899652  | -0.06652726 |
| C | -1.53934364 | 2.63751752  | -0.06652726 |
| C | -2.04412964 | 1.36203752  | -0.06652726 |
| H | 2.45870736  | 1.40970552  | -0.06652726 |
| H | 0.44188936  | 3.40984752  | -0.06652726 |
| H | -2.05772264 | 3.58585852  | -0.06652726 |
| H | -3.08887364 | 1.08786752  | -0.06652726 |
| F | 3.00255136  | -1.13487648 | -0.06652726 |

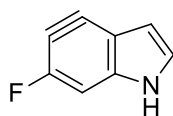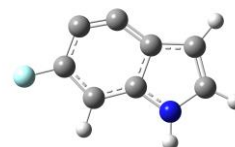

#### 6-chloro-4,5-indolyne

|    |             |             |            |
|----|-------------|-------------|------------|
| C  | -1.15861251 | 0.42340943  | 0.01423515 |
| C  | 1.42112749  | 1.12312543  | 0.01423515 |
| C  | -0.29827951 | -0.47929357 | 0.01423515 |
| C  | -1.01060351 | 1.80220243  | 0.01423515 |
| C  | 0.40429149  | 2.09974743  | 0.01423515 |
| C  | 1.07143149  | -0.23431157 | 0.01423515 |
| N  | 0.49775849  | 3.47653243  | 0.01423515 |
| C  | -0.76623251 | 4.03208043  | 0.01423515 |
| C  | -1.71671851 | 3.04127543  | 0.01423515 |
| H  | 2.46838649  | 1.40888543  | 0.01423515 |
| H  | 1.35829849  | 4.00207343  | 0.01423515 |
| H  | -0.88872151 | 5.10600443  | 0.01423515 |
| H  | -2.78740551 | 3.18366243  | 0.01423515 |
| Cl | 2.31840349  | -1.47344357 | 0.01423515 |

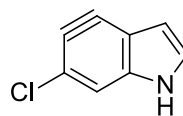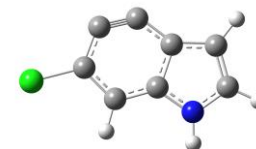

### 6-iodo-4,5-indolyne

|   |             |             |            |
|---|-------------|-------------|------------|
| C | 2.33116900  | 0.16315100  | 0.00000000 |
| C | -0.08549000 | -1.01701200 | 0.00000000 |
| C | 1.29877700  | 0.86291700  | 0.00000000 |
| C | 2.43304600  | -1.22260900 | 0.00000000 |
| C | 1.09992800  | -1.78302300 | 0.00000000 |
| C | 0.00000000  | 0.38311100  | 0.00000000 |
| N | 1.26790000  | -3.15333700 | 0.00000000 |
| C | 2.61399300  | -3.45909600 | 0.00000000 |
| C | 3.36060800  | -2.30594900 | 0.00000000 |
| H | -1.05543100 | -1.50433900 | 0.00000000 |
| H | 0.52262400  | -3.83245800 | 0.00000000 |
| H | 2.93779600  | -4.49039200 | 0.00000000 |
| H | 4.43894900  | -2.24415800 | 0.00000000 |
| I | -1.77417800 | 1.59275000  | 0.00000000 |

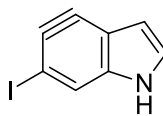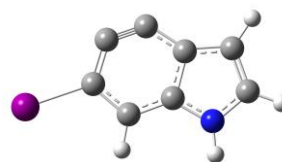

### 4-methoxy-5,6-indolyne

|   |             |             |             |
|---|-------------|-------------|-------------|
| C | -1.06492600 | -0.01495300 | 0.00011000  |
| C | 1.12439200  | 1.97350900  | -0.00012000 |
| C | -1.22445800 | 1.36360800  | 0.00012100  |
| C | 0.30287300  | -0.41655800 | 0.00014400  |
| C | 1.34831100  | 0.56602500  | 0.00005900  |
| C | -0.23440300 | 2.13972300  | -0.00007100 |
| N | 2.53958700  | -0.12874100 | -0.00003900 |
| C | 2.28805500  | -1.49271500 | -0.00018100 |
| C | 0.93694000  | -1.70566300 | 0.00015100  |
| H | 1.90720300  | 2.72255300  | -0.00012700 |
| H | 3.45464500  | 0.29287500  | -0.00013300 |
| H | 3.10738600  | -2.19842500 | -0.00029900 |
| H | 0.43978500  | -2.66459900 | 0.00033600  |
| O | -2.02751500 | -0.96594300 | -0.00000100 |
| C | -3.36574700 | -0.48162000 | -0.00014000 |
| H | -3.56042900 | 0.12728900  | -0.89167200 |
| H | -3.56196400 | 0.12352600  | 0.89362500  |
| H | -4.00982900 | -1.36263900 | -0.00252600 |

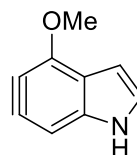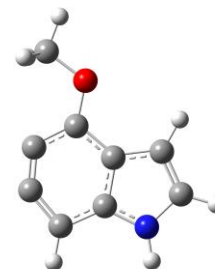

### 4-Fluoro-5,6-indolyne

|   |             |             |            |
|---|-------------|-------------|------------|
| C | -1.41502000 | 0.43455100  | 0.00000000 |
| C | 0.16385500  | -2.03212100 | 0.00000000 |
| C | -1.94891400 | -0.83230200 | 0.00000000 |
| C | 0.00000000  | 0.48524000  | 0.00000000 |
| C | 0.75447900  | -0.73783800 | 0.00000000 |
| C | -1.19105800 | -1.83689200 | 0.00000000 |

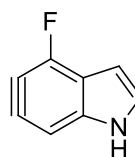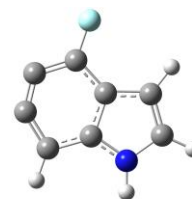

|   |             |             |            |
|---|-------------|-------------|------------|
| N | 2.08453600  | -0.37633500 | 0.00000000 |
| C | 2.19419100  | 1.00595100  | 0.00000000 |
| C | 0.94627600  | 1.56556700  | 0.00000000 |
| H | 0.71984700  | -2.96204200 | 0.00000000 |
| H | 2.86009800  | -1.01977800 | 0.00000000 |
| H | 3.16867800  | 1.47455100  | 0.00000000 |
| H | 0.71702100  | 2.62109300  | 0.00000000 |
| F | -2.12002800 | 1.57862100  | 0.00000000 |

#### 4-chloro-5,6-indolye

|    |             |             |            |
|----|-------------|-------------|------------|
| C  | 0.92366200  | -0.70932700 | 0.00000000 |
| C  | -1.97922500 | -1.20158200 | 0.00000000 |
| C  | 0.30844900  | -1.93601800 | 0.00000000 |
| C  | 0.00000000  | 0.37180800  | 0.00000000 |
| C  | -1.41620600 | 0.10191900  | 0.00000000 |
| C  | -0.93738800 | -2.09427300 | 0.00000000 |
| N  | -2.04899200 | 1.32672200  | 0.00000000 |
| C  | -1.10559700 | 2.33944600  | 0.00000000 |
| C  | 0.15140600  | 1.79830900  | 0.00000000 |
| H  | -3.04441500 | -1.40450900 | 0.00000000 |
| H  | -3.04759300 | 1.46291400  | 0.00000000 |
| H  | -1.41728300 | 3.37488100  | 0.00000000 |
| H  | 1.08332600  | 2.34426100  | 0.00000000 |
| Cl | 2.65284100  | -0.41684000 | 0.00000000 |

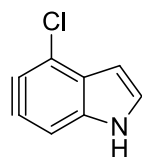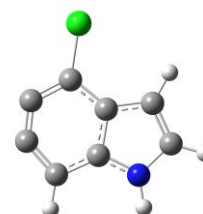

#### 4-bromo-5,6-indolye

|    |             |             |             |
|----|-------------|-------------|-------------|
| C  | 0.50110266  | 1.10541764  | -0.01588394 |
| C  | -1.67390334 | -0.87845036 | -0.01588394 |
| C  | -0.84242234 | 1.36759664  | -0.01588394 |
| C  | 0.78419866  | -0.28699136 | -0.01588394 |
| C  | -0.30029534 | -1.23736436 | -0.01588394 |
| C  | -1.74371534 | 0.49313164  | -0.01588394 |
| N  | 0.27667966  | -2.48954536 | -0.01588394 |
| C  | 1.65555766  | -2.36804136 | -0.01588394 |
| C  | 2.00169666  | -1.04395436 | -0.01588394 |
| H  | -2.48832534 | -1.59472336 | -0.01588394 |
| H  | -0.22960334 | -3.36103236 | -0.01588394 |
| H  | 2.28034766  | -3.25062336 | -0.01588394 |
| H  | 3.00361066  | -0.64061836 | -0.01588394 |
| Br | 1.91195866  | 2.38975564  | -0.01588394 |

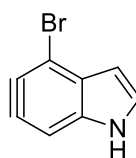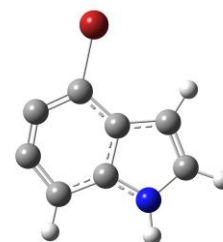

#### 4-iodo-5,6-indolyne

|   |             |             |             |
|---|-------------|-------------|-------------|
| C | -0.55688840 | -0.31940498 | -0.00855972 |
| C | 2.20891460  | -1.33572098 | -0.00855972 |
| C | -0.15519340 | -1.62407798 | -0.00855972 |
| C | 0.54804860  | 0.57679202  | -0.00855972 |
| C | 1.89318460  | 0.04763802  | -0.00855972 |
| C | 1.02924460  | -2.04194498 | -0.00855972 |
| N | 2.74294260  | 1.13360902  | -0.00855972 |
| C | 2.00517460  | 2.30341102  | -0.00855972 |
| C | 0.66873660  | 2.00637302  | -0.00855972 |
| H | 3.22240960  | -1.72304998 | -0.00855972 |
| H | 3.74944760  | 1.08130402  | -0.00855972 |
| H | 2.50300660  | 3.26331102  | -0.00855972 |
| H | -0.14325540 | 2.71881502  | -0.00855972 |
| I | -2.58020840 | 0.38402102  | -0.00855972 |

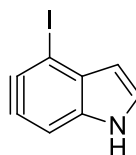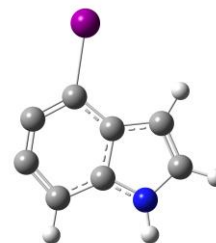

#### 5-methoxy-6,7-indolyne

|   |             |             |             |
|---|-------------|-------------|-------------|
| C | -0.06398922 | -1.41708275 | -0.00633552 |
| C | -0.52410222 | 1.25186125  | -0.00597352 |
| C | -1.23253922 | -0.97287375 | -0.00630752 |
| C | 1.07936778  | -0.64146275 | -0.00621152 |
| C | 0.80593778  | 0.77300125  | -0.00614652 |
| C | -1.62120022 | 0.37448325  | -0.00604152 |
| C | 3.04961878  | 0.42611525  | -0.00646752 |
| H | -0.72899722 | 2.31877925  | -0.00596952 |
| H | 2.28931178  | 2.47458925  | -0.00670152 |
| H | 4.12764178  | 0.50607925  | -0.00658952 |
| H | 2.92033178  | -1.70483375 | -0.00529052 |
| O | -2.88664622 | 0.86842425  | -0.00619052 |
| C | -3.92104922 | -0.10561375 | -0.00634752 |
| H | -3.86497922 | -0.74156475 | -0.89958152 |
| H | -4.86238622 | 0.44696325  | -0.00649452 |
| H | -3.86524122 | -0.74154375 | 0.88691648  |
| N | 2.44417278  | -0.81717175 | -0.00572852 |
| C | 2.09487678  | 1.41078325  | -0.00649752 |

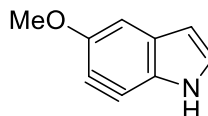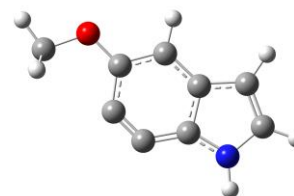

#### 5-fluoro-6,7-indolyne

|   |             |             |            |
|---|-------------|-------------|------------|
| C | -0.72071900 | -1.47075600 | 0.00000000 |
| C | 1.33023000  | 0.28723900  | 0.00000000 |
| C | 0.45566500  | -1.89174700 | 0.00000000 |
| C | -1.11088700 | -0.14519700 | 0.00000000 |
| C | 0.00000000  | 0.77175700  | 0.00000000 |

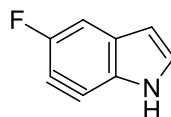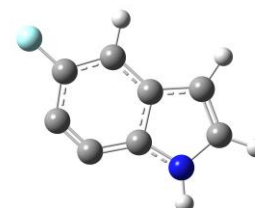

|   |             |             |            |
|---|-------------|-------------|------------|
| C | 1.58933500  | -1.08405500 | 0.00000000 |
| C | -1.94860200 | 1.93223700  | 0.00000000 |
| H | 2.17389200  | 0.97126500  | 0.00000000 |
| H | -0.05718300 | 3.02647200  | 0.00000000 |
| H | -2.73015700 | 2.67875600  | 0.00000000 |
| H | -3.20566300 | 0.20581600  | 0.00000000 |
| F | 2.85262800  | -1.54329000 | 0.00000000 |
| C | -0.58585500 | 2.08368700  | 0.00000000 |
| N | -2.27279200 | 0.58690200  | 0.00000000 |

### 5-chloro-6,7- indolyne

|    |             |             |            |
|----|-------------|-------------|------------|
| C  | -2.42402440 | -0.40604594 | 0.03381170 |
| C  | 0.16127960  | 0.46987306  | 0.03381170 |
| C  | -1.45580940 | -1.19445994 | 0.03381170 |
| C  | -2.26749440 | 0.97075306  | 0.03381170 |
| C  | -0.89548740 | 1.41063806  | 0.03381170 |
| C  | -0.09869840 | -0.90808694 | 0.03381170 |
| C  | -2.26957440 | 3.21219106  | 0.03381170 |
| H  | 1.19394760  | 0.80624806  | 0.03381170 |
| H  | -0.10756440 | 3.52623606  | 0.03381170 |
| H  | -2.71724640 | 4.19593306  | 0.03381170 |
| H  | -4.07842240 | 2.07592006  | 0.03381170 |
| Cl | 1.19624260  | -2.08898394 | 0.03381170 |
| N  | -3.07048540 | 2.08272806  | 0.03381170 |
| C  | -0.94860540 | 2.84683106  | 0.03381170 |

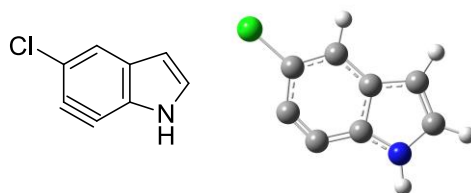

### 5-bromo-6,7- indolyne

|    |             |             |            |
|----|-------------|-------------|------------|
| C  | 3.57571401  | 1.04507281  | 0.05802625 |
| C  | 0.85311701  | 0.74772581  | 0.05802625 |
| C  | 3.01573701  | -0.07121519 | 0.05802625 |
| C  | 2.84532001  | 2.22443381  | 0.05802625 |
| C  | 1.41537501  | 2.04618681  | 0.05802625 |
| C  | 1.67033801  | -0.39190219 | 0.05802625 |
| C  | 1.90217801  | 4.25851781  | 0.05802625 |
| H  | -0.22491099 | 0.61706281  | 0.05802625 |
| H  | -0.19100899 | 3.63236281  | 0.05802625 |
| H  | 1.89373801  | 5.33932081  | 0.05802625 |
| H  | 4.02155001  | 3.98968681  | 0.05802625 |
| Br | 0.94190301  | -2.15298219 | 0.05802625 |
| C  | 0.85802301  | 3.37074481  | 0.05802625 |
| N  | 3.10442801  | 3.57142681  | 0.05802625 |

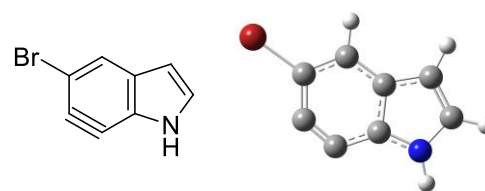



### 5-iodo-6,7- indolyne

|   |             |             |            |
|---|-------------|-------------|------------|
| C | 0.47555287  | 0.37631104  | 0.15414728 |
| C | -2.13328913 | -0.50108996 | 0.15414728 |
| C | -0.51547513 | 1.13797204  | 0.15414728 |
| C | 0.29736587  | -1.00163096 | 0.15414728 |
| C | -1.07486613 | -1.44204796 | 0.15414728 |
| C | -1.86986613 | 0.87797304  | 0.15414728 |
| C | 0.29682387  | -3.24483396 | 0.15414728 |
| H | -3.16350313 | -0.84483796 | 0.15414728 |
| H | -1.86555213 | -3.55703696 | 0.15414728 |
| H | 0.74483787  | -4.22840796 | 0.15414728 |
| H | 2.10684987  | -2.10879896 | 0.15414728 |
| I | -3.42741213 | 2.34093304  | 0.15414728 |
| C | -1.02402413 | -2.87869696 | 0.15414728 |
| N | 1.09883887  | -2.11505696 | 0.15414728 |

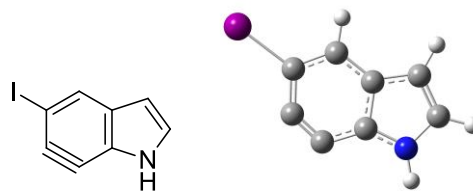

The Cartesian coordinates of transition state structures of Fig. 5 (HF/6-31G\*).

### TS1

|   |             |             |             |
|---|-------------|-------------|-------------|
| N | 1.99247200  | -1.45908800 | -0.26155100 |
| C | 3.85525500  | 0.60994900  | -0.00699600 |
| C | 1.59627600  | -0.19561200 | -0.06592600 |
| C | 3.27333100  | -1.68066300 | -0.32529600 |
| C | 4.25535500  | -0.68014000 | -0.20401000 |
| C | 2.48068600  | 0.90855100  | 0.07142400  |
| C | 1.96394900  | 2.23376400  | 0.27775700  |
| C | 0.62843700  | 2.48632400  | 0.35040500  |
| C | -0.26950400 | 1.37205500  | 0.22384500  |
| C | 0.28220000  | 0.27318400  | 0.02999700  |
| C | -1.30652600 | -1.79486400 | 0.81955100  |
| C | -1.21323800 | -1.49709200 | -0.49986400 |
| O | -2.28235500 | -0.73539900 | -0.86029000 |
| C | -2.96602100 | -0.47459700 | 0.24397900  |
| C | -2.45091800 | -1.11617200 | 1.31843100  |
| H | 4.57872200  | 1.40051700  | 0.08907800  |
| H | 3.57340900  | -2.70264600 | -0.48201900 |
| H | 5.29485000  | -0.94205000 | -0.26811300 |
| H | 2.67260700  | 3.03841500  | 0.38029700  |
| H | 0.27527200  | 3.49005100  | 0.50868900  |
| H | -0.61437700 | -2.40092400 | 1.36576000  |
| H | -2.81126200 | -1.06003200 | 2.32236400  |

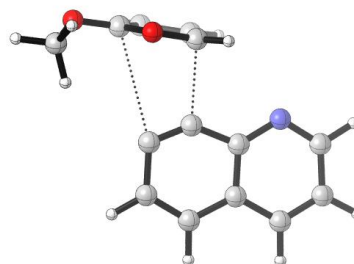

|   |             |             |             |
|---|-------------|-------------|-------------|
| H | -0.60306900 | -1.87000200 | -1.28991900 |
| O | -4.03621700 | 0.28188400  | 0.14843900  |
| C | -4.05389800 | 1.27446200  | -0.86391500 |
| H | -4.93322000 | 1.86935100  | -0.67335900 |
| H | -3.16277300 | 1.88382100  | -0.80097900 |
| H | -4.12119100 | 0.82033800  | -1.84243900 |

## TS2

|   |             |             |             |
|---|-------------|-------------|-------------|
| N | -1.82366100 | 1.66379200  | 0.09319400  |
| C | -3.81237900 | -0.29062900 | -0.01369800 |
| C | -1.47801600 | 0.35972000  | 0.02215800  |
| C | -3.08244600 | 1.97191100  | 0.10554700  |
| C | -4.13180700 | 1.02905100  | 0.05421800  |
| C | -2.45201900 | -0.67539600 | -0.03351800 |
| C | -2.06017600 | -2.05348600 | -0.10568400 |
| C | -0.74583700 | -2.41700000 | -0.12247900 |
| C | 0.07758500  | -1.28836300 | -0.06971000 |
| C | -0.11314900 | -0.05589400 | 0.01498800  |
| C | 2.79920100  | -0.07000700 | 1.11732000  |
| C | 2.71661700  | 0.39452700  | -0.17072200 |
| O | 2.54696900  | -0.58422700 | -1.02714900 |
| C | 2.30019000  | -1.71227000 | -0.30162400 |
| C | 2.55534600  | -1.44695600 | 1.01627700  |
| O | 2.87071300  | 1.57585100  | -0.70862100 |
| C | 2.53372600  | 2.69566900  | 0.08958300  |
| H | -4.58149900 | -1.04251700 | -0.05382700 |
| H | -3.31987400 | 3.02153500  | 0.16046400  |
| H | -5.15306400 | 1.36248000  | 0.06996800  |
| H | -2.82834200 | -2.80603200 | -0.15099200 |
| H | -0.41729100 | -3.43680700 | -0.18196200 |
| H | 2.93587100  | 0.51194700  | 2.00243700  |
| H | 2.28562900  | -2.62464100 | -0.85545100 |
| H | 2.49839400  | -2.15561100 | 1.81688900  |
| H | 3.21593400  | 2.78911400  | 0.92573200  |
| H | 1.51438400  | 2.60000800  | 0.43736000  |
| H | 2.63300500  | 3.55571400  | -0.55275200 |

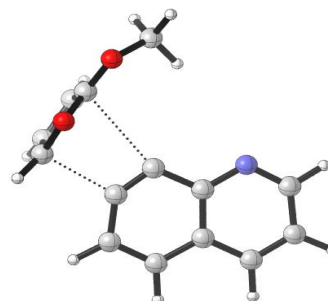

Supplement: c8nj04027c1.pdf [file c8nj04027c1.pdf]
